# Supplementary material for: Modulation of dopamine tone induces frequency shifts in cortico-basal ganglia beta oscillations
Source: PubMed Central journal article supplement (PMC8640051; doi:10.1038/s41467-021-27375-5), 2021-12-02
Supplement: 41467_2021_27375_MOESM1_ESM.pdf [file 41467_2021_27375_MOESM1_ESM.pdf]

## Supplementary Figures

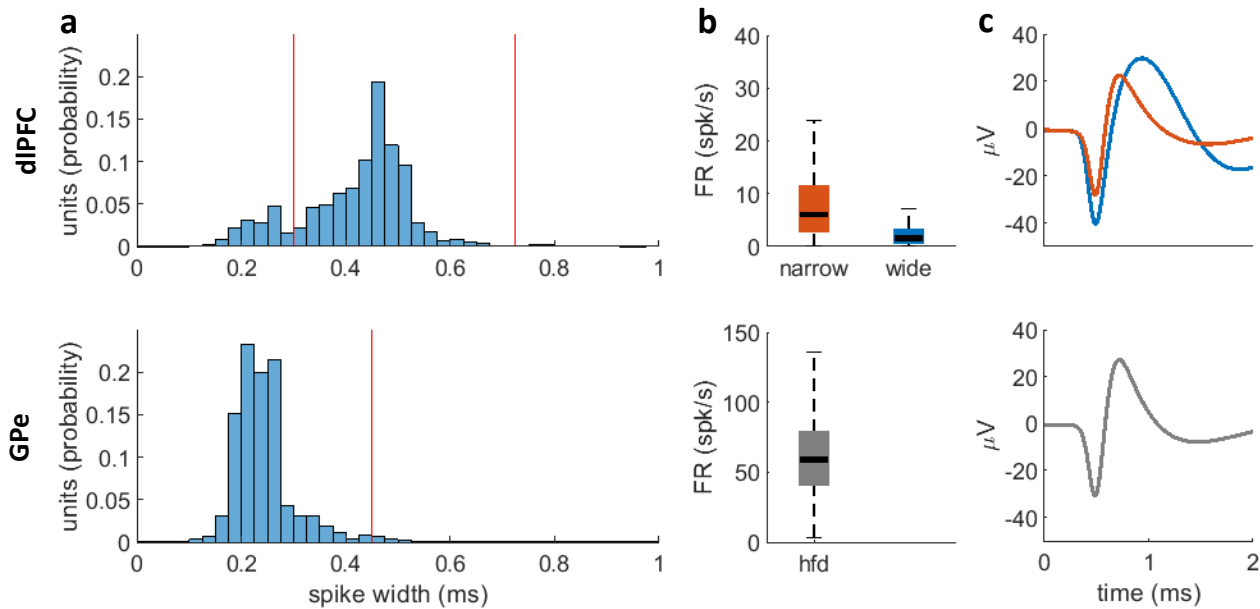

**Supplementary Fig.1. Description of cortical and pallidal single unit spike-shape and firing rate properties.** dIPFC units and GPe units. (a) Spike width histogram. Cortical wide and narrow units were defined according to their spike width (trough to peak). Units with spike width that exceeded 3 SD over the mean were considered as outliers and excluded from the dataset. (b) Single unit firing rate ( $N_{\text{narrow}}=321$ ,  $N_{\text{wide}}=1736$ ,  $N_{\text{hfd}}=1636$  units before outlier exclusion). On each box, the central line indicates the median, and the bottom and top edges of the box indicate the 25th and 75th percentiles, respectively. The whiskers extend to the most extreme data points within  $1.5 \times \text{IQR}$  (interquartile range, equal to the length of the box) distance from the edge of the box. Narrow units had higher firing rate relative to wide units, in-line with their identification as putative interneurons and pyramidal cells, respectively. (c) Average spike shape of cortical wide (blue), narrow (orange), and pallidal high-frequency discharge (HFD) (gray) units. Source data are provided as a Source Data file. dIPFC: dorsolateral prefrontal cortex, GPe: globus pallidus pars externa, FR: firing rate, spk: spikes, s: second, ms: millisecond,  $\mu$ V: microvolt

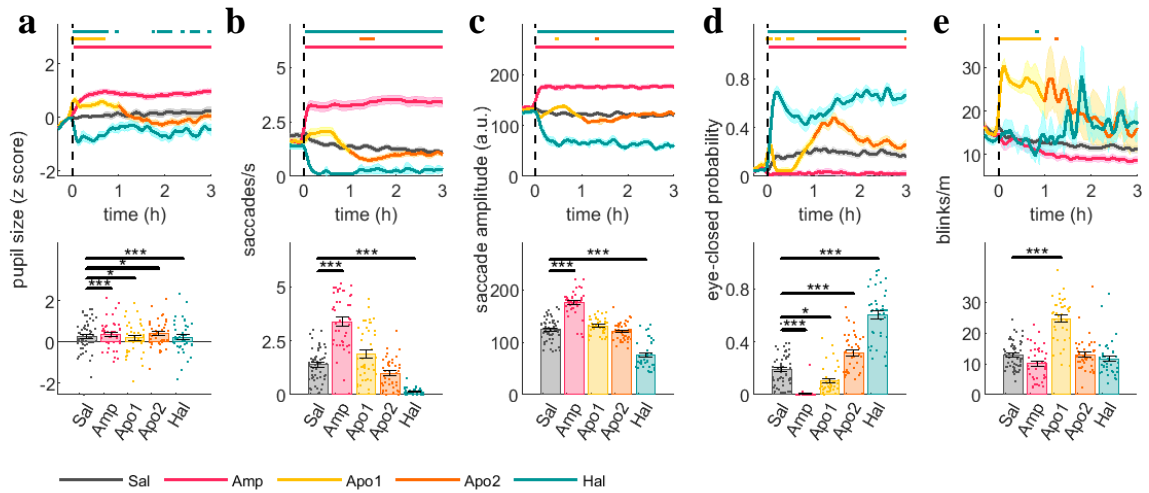

**Supplementary Fig. 2. Behavioral effect of dopamine tone modulation.** Dopamine modulation had an ongoing effect on eye behavior parameters including (a) pupil size, (b) saccade frequency, (c) saccade amplitude, (d) the percentage of time in which the monkey eyes were closed, (e) blink frequency. Upper row: average behavior as a function of time locked to drug injection (dashed line). N=224 days. Shadows indicate standard error of the mean (STE). Straight lines in the upper part of the panel mark time in which behavior post drug injection was significantly different from saline (Two-sample t-test with Bonferroni correction for multiple comparisons. See methods). Lower row: average over time (mean $\pm$ STE). Each dot marks a single day and bars represent average over days. After outlier exclusion of samples that exceed 3 SD distance from the mean, N=216, 223, 224, 222, and 221 for pupil size, saccade frequency, saccade amplitude, eye-closed probability, and blink frequency, respectively. Drug effects were assessed by one-way ANOVA followed by post-hoc Tukey test (Table-S3). Dopamine up-modulation (Amp, Apo1) led to increased pupil size (a; Amp:  $p=8.3e-8$ , Apo1:  $p=0.032$ ), saccade frequency (b; Amp:  $p=9.9e-9^a$ ) and amplitude (c; Amp:  $p=9.9e-9^a$ ), and blink frequency (E; Apo1:  $p=9.9e-9^a$ ), and decreased eye-closure probability (d; Amp:  $p=1.0e-8$ , Apo1:  $p=0.014$ ). Dopamine down-modulation by haloperidol led to an opposite effect in all parameters excluding blink frequency (pupil size:  $p=1.3e-8$ , saccade frequency:  $p=1.0e-8$ , saccade amplitude:  $p=9.9e-9^a$ , eye-closure probability:  $p=9.9e-9^a$ ). The behavioral profile during Apo2 was similar to that of dopamine down-modulated post-haloperidol recording (Hal) (pupil size:  $p=0.018$ , eye-closure probability:  $p=1.2e-5$ ). Results are detailed in Table-S3. Source data are provided as a Source Data file. \* $p<0.05$ , \*\* $p<0.01$ , \*\*\* $p<0.001$ , <sup>a</sup>post-hoc p-value resolution was limited to  $9.9e-9$ . Sal: saline, Amp: amphetamine, Apo1/2: Apomorphine phase 1/2, Hal: haloperidol, h: hours

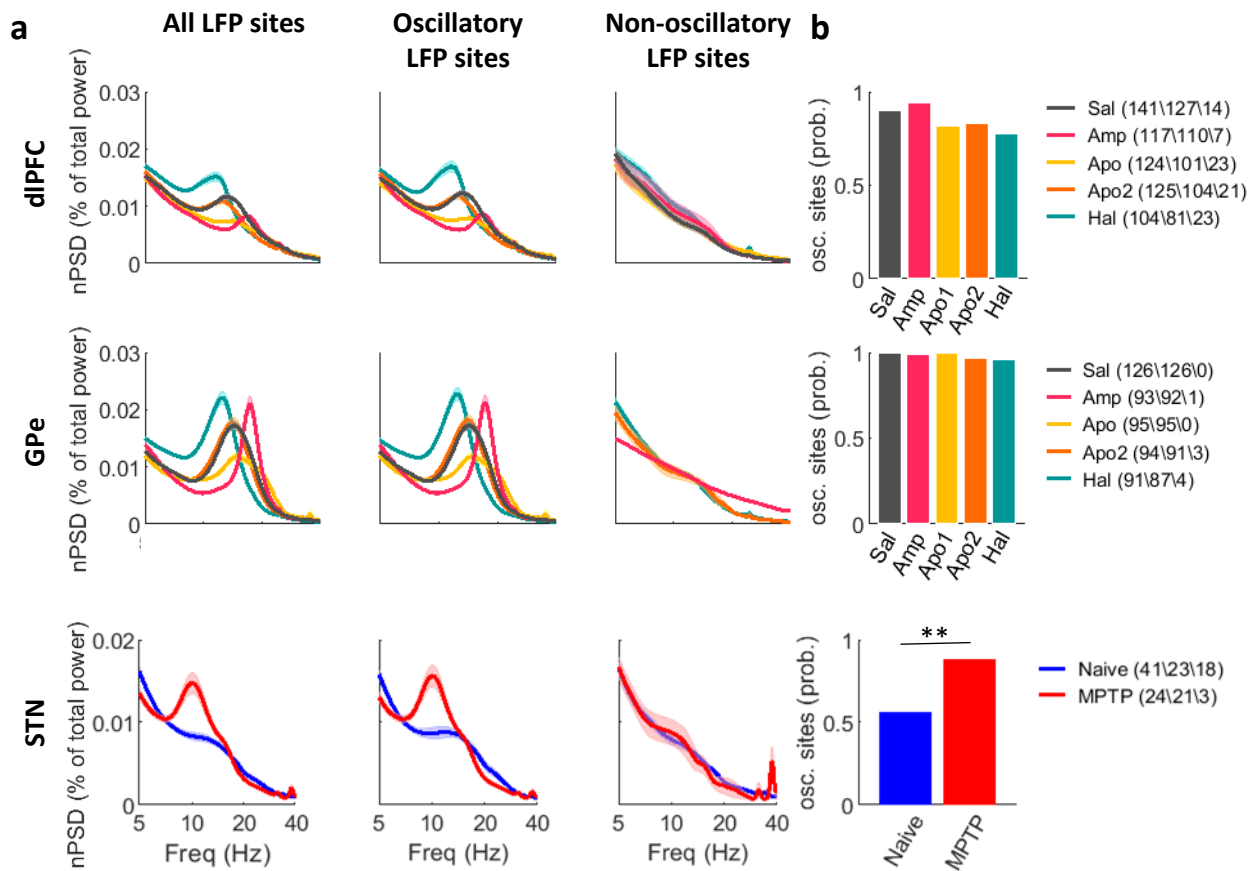

**Supplementary Fig.3 Identification of LFP oscillatory sites in NHPs.** (a) Average normalized spectrogram (nPSD) of all (left), oscillatory (middle), and non-oscillatory (right) LFP sites in all drug conditions. (b) Fraction of oscillatory sites out of all the recorded sites in each condition. Drug effect was tested with chi-square test followed by pairwise comparisons with Bonferroni correction for multiple comparisons. Top row: dIPFC acute dopamine modulation. Middle row: GPe acute dopamine modulation. Bottom row: STN chronic dopamine modulation. Shadow indicates standard error of the mean. Legend includes counts of all, oscillatory, and non-oscillatory sites, respectively. Chronic MPTP increased the number of oscillatory LFP sites in the STN (chi-square test, N=63 LFP sites,  $p=0.009$ ). Results are detailed in Supplementary Table 5. Source data are provided as a Source Data file. \* $p<0.05$ , \*\* $p<0.01$ , \*\*\* $p<0.001$ . LFP: local field potential, NHP: non-human primate, dIPFC: dorsolateral prefrontal cortex, GPe: globus pallidus pars externa, STN: subthalamic nucleus, Sal: saline, Amp: amphetamine, Apo1/2: Apomorphine phase 1/2, Hal: haloperidol, (n)PSD: (normalized) power spectrum density, osc: oscillatory, Freq: frequency, prob: probability

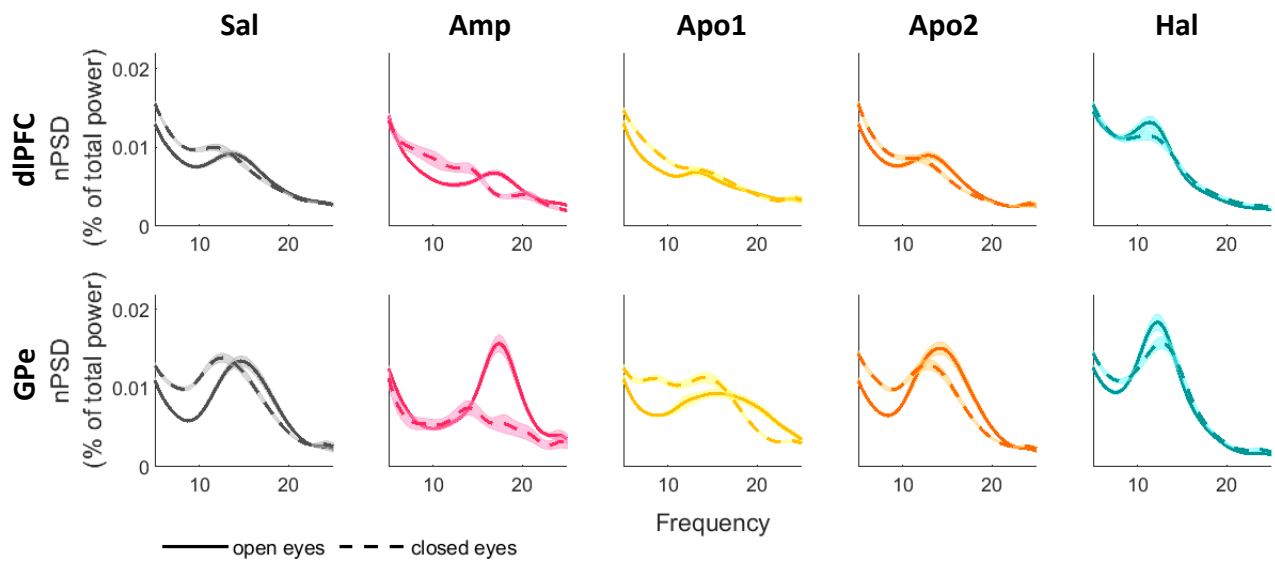

**Supplementary Fig.4. Beta activity during eye-open and eye-closed states.** Normalized LFP PSD in the dlPFC (top) and GPe (bottom) at times in which the monkey eyes were open (solid line) or closed (dashed line), presented for each drug condition. Shadows mark standard error of the mean (STE). Source data are provided as a Source Data file. nPSD: normalized power spectral density, Sal: saline, Amp: amphetamine, Apo: apomorphine, Hal: haloperidol

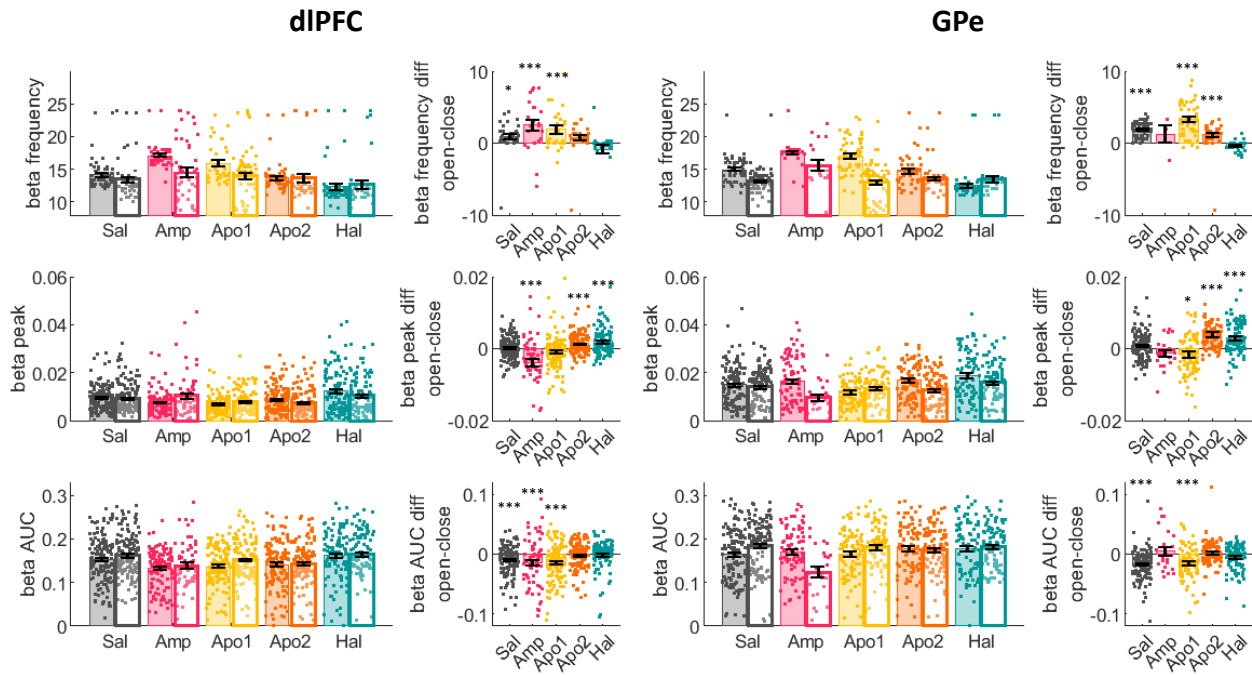

**Supplementary Fig.5. Effect of eye state, open vs. closed, on beta oscillation properties.** Eye state, open vs. closed, modulated beta frequency, beta peak, and area under curve (AUC) in the dIPFC and GPe. First and third columns: For each day, recording was divided into times at which eyes were open (filled bars) or closed (empty bars), normalized PSD (nPSD) and beta properties were calculated for each state. Each dot represents a single day and bars represent average over days. Whiskers mark the standard error of the mean (STE). Second and fourth columns: Each dot represents the difference in a given parameter between eye-open and eye-closed states for a single LFP site. First row:  $N_{\text{dIPFC}}=142$ ,  $N_{\text{GPe}}=186$  LFP sites which were oscillatory in both eye-state conditions. Second and third row:  $N_{\text{dIPFC}}=565$ ,  $N_{\text{GPe}}=414$  LFP sites. Bars mark the average difference over days and whiskers mark the STE. Eye-state effect was assessed using a two-way mixed-design ANOVA with eye-state as a within-factor and drug condition as a between-factor, followed by post-hoc pairwise comparison of eye-state effect within each drug with Bonferroni correction for multiple comparisons. Results reveal that within the different drug conditions, eye-closure was associated with a decrease in LFP beta-frequency in the dIPFC (Sal:  $p=0.035$ , Amp:  $p=2.1 \times 10^{-5}$ , Apo1:  $p=4.0 \times 10^{-4}$ ) and GPe (Sal:  $p=6.2 \times 10^{-16}$ , Apo1:  $p=7.5 \times 10^{-28}$ , Apo2:  $p=2.2 \times 10^{-5}$ ). Eye-closure effect on beta power depended on drug condition. During saline, Amp and Apo1 conditions eye-closure was associated with increase in beta power in the dIPFC (beta-peak: Amp:  $p=8.3 \times 10^{-11}$ ; beta AUC: Sal:  $p=2.1 \times 10^{-5}$ , Amp:  $p=7.8 \times 10^{-5}$ , Apo1:  $p=1.6 \times 10^{-10}$ ) and GPe (beta-peak: Apo1:  $p=0.02$ ; beta AUC: Sal:  $p=6.2 \times 10^{-15}$ , Apo1:  $p=6.5 \times 10^{-9}$ ). Conversely, During Apo2 and Hal conditions, eye-closure was associated with decrease in beta peak in the dIPFC (Apo2:  $p=4.5 \times 10^{-4}$ , Hal:  $p=1.0 \times 10^{-5}$ ) and GPe (Apo2:  $p=7.4 \times 10^{-11}$ , Hal:  $p=2.0 \times 10^{-6}$ ). Results are detailed in Table-S6. Source data are provided as a Source Data file. \* $p<0.05$ , \*\* $p<0.01$ , \*\*\* $p<0.001$ . AUC: area under the curve, Sal: saline, Amp: amphetamine, Apo: apomorphine, Hal: haloperidol, diff: difference.

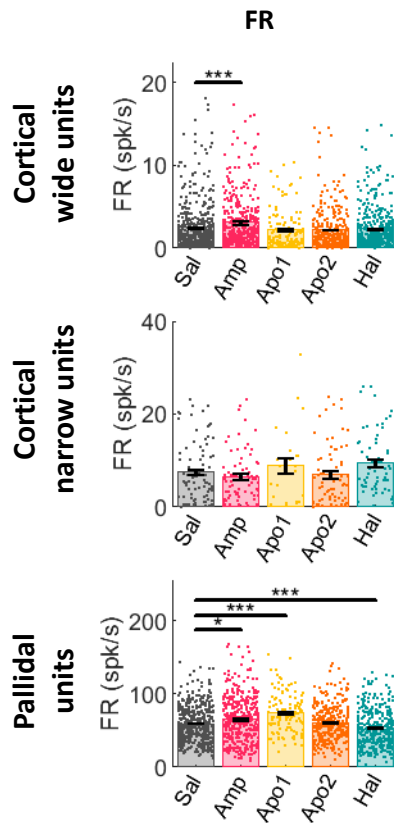

**Supplementary Fig.6. Single unit FR.** Top: cortical wide units. Amphetamine increased FR. Middle: cortical narrow units. No statistically significant results. Bottom: pallidal units. FR was increased by amphetamine and apomorphine (Apo1), and decreased by haloperidol. Bars indicate average values. Single points indicate individual unit values within the range of mean  $\pm$  3 SD. N=1715, 318 and 1627 wide, narrow and pallidal units. Black vertical lines indicate standard error of the mean. Drug influence was evaluated by Kruskal-Wallis test followed by post-hoc Tukey test. FR of cortical wide units was increased by Amp ( $p=2.8e-4$ ). FR of pallidal units was increased by Amp ( $p=0.023$ ) and Apo1 ( $p=9.4e-7$ ) and decreased by Hal ( $p=6.0e-4$ ). Results are detailed in Table-S7. Source data are provided as a Source Data file. \* $p<0.05$ , \*\* $p<0.01$ , \*\*\* $p<0.001$  Sal: saline, Amp: amphetamine, Apo1/2: Apomorphine phase 1/2, Hal: haloperidol, FR: firing rate.

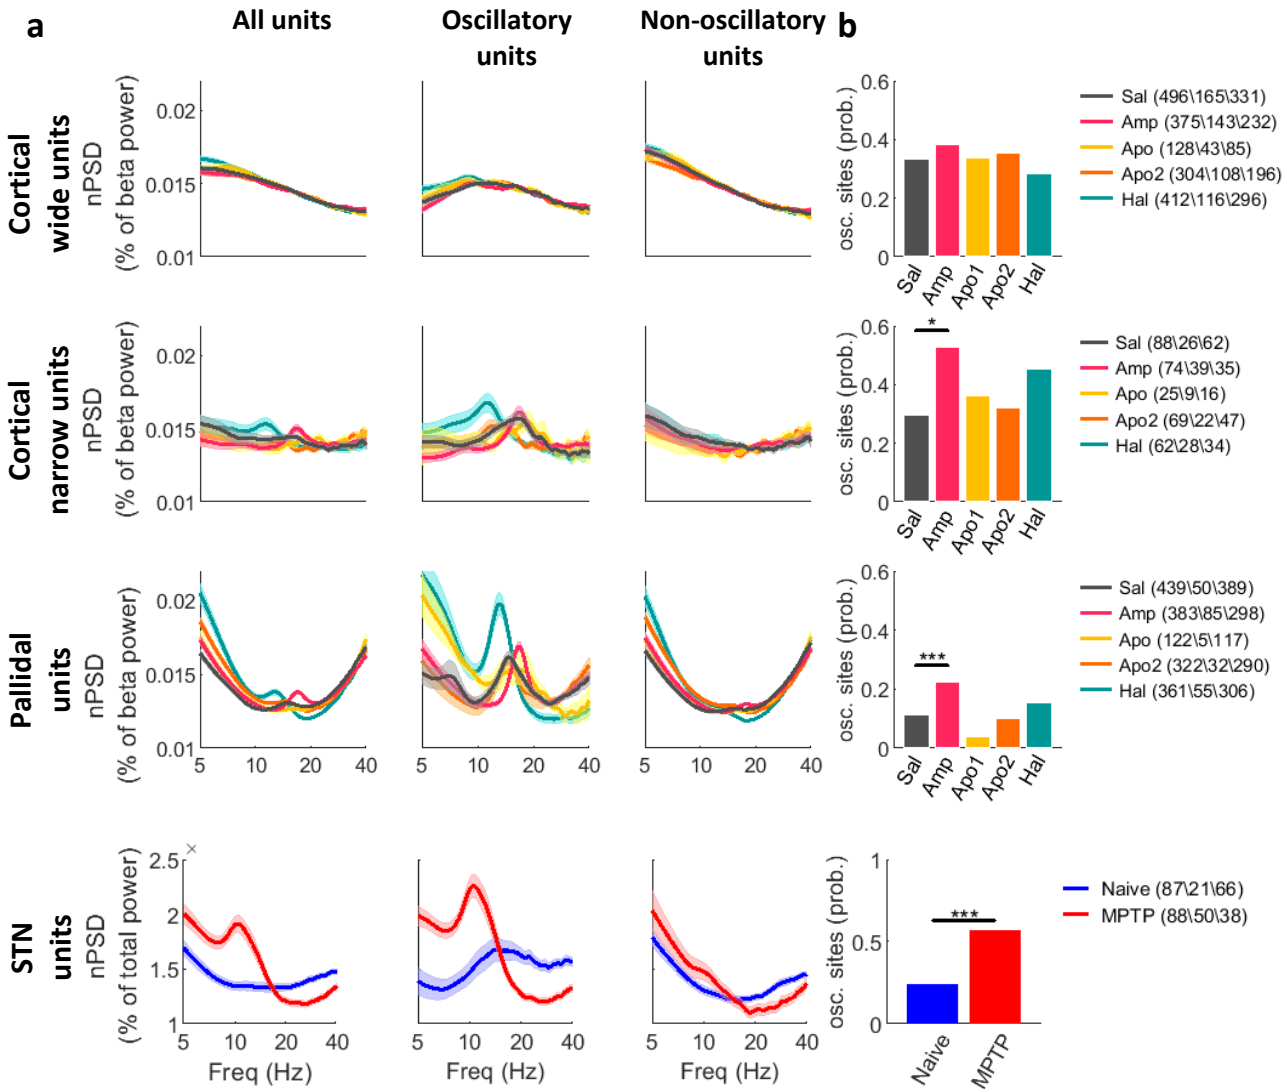

**Supplementary Fig.7. Identification of oscillatory units.** (a) Average normalized spectrogram (nPSD) of all (left), oscillatory (middle), and non-oscillatory (right) single units for cortical wide (1<sup>st</sup> row), narrow (2<sup>nd</sup> row), pallidal (3<sup>rd</sup> row), and subthalamic (4<sup>th</sup> row) single units under acute (upper three rows) and chronic (4<sup>th</sup> row) dopamine modulation. Acute nPSDs normalized to extended range beta-power (5-40Hz) for presentation purposes. Shadow indicates standard error of the mean. (b) Percentage of oscillatory units out of total recorded units in each condition.  $N_{\text{wide}}=1715$ ,  $N_{\text{narrow}}=318$ ,  $N_{\text{pallidal}}=1627$ ,  $N_{\text{STN}}=175$  units. Drug effects were evaluated using chi-square test followed by pairwise comparisons with Bonferroni correction for multiple comparisons. Amphetamine increased the number of oscillatory units in cortical narrow units ( $p=0.027$ ) and pallidal units ( $p=3.0e-4$ ). Chronic MPTP increase the number of oscillatory units in the STN ( $p=1.1e-5$ ). Legend includes counts of all, oscillatory, and non-oscillatory sites, respectively. Results are detailed in Table-S5. Source data are provided as a Source Data file. \* $p<0.05$ , \*\* $p<0.01$ , \*\*\* $p<0.001$ . Sal: saline, Amp: amphetamine, Apo1/2: Apomorphine phase 1/2, Hal: haloperidol, nPSD: normalized power spectral density, Freq: frequency, osc: oscillatory, prob: probability.

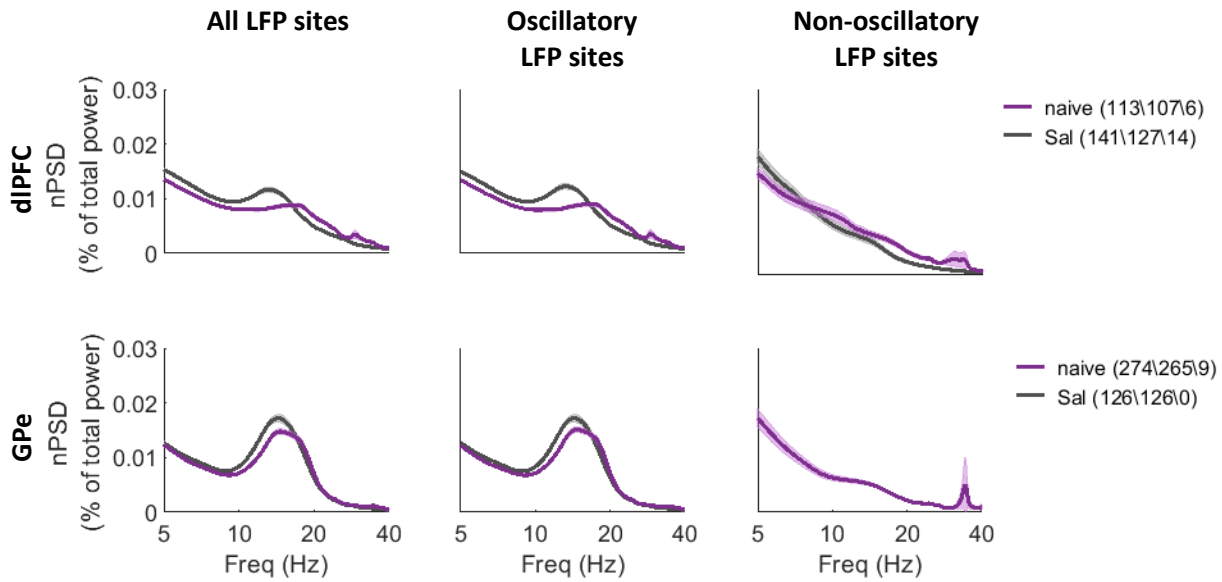

**Supplementary Fig.8. Comparisons of LFP beta activity in drug-naïve and control-saline conditions.** Average normalized PSD (nPSD) of all, oscillatory, and non-oscillatory LFP sites in drug-naïve and saline conditions within the dlPFC and GPe. Shadow indicates standard error of the mean. Legend includes counts of all, oscillatory, and non-oscillatory LFP sites for each condition, respectively. Results are detailed in Table-S8. Source data are provided as a Source Data file. nPSD: normalized power spectral density, Sal: saline, Freq:frequency.



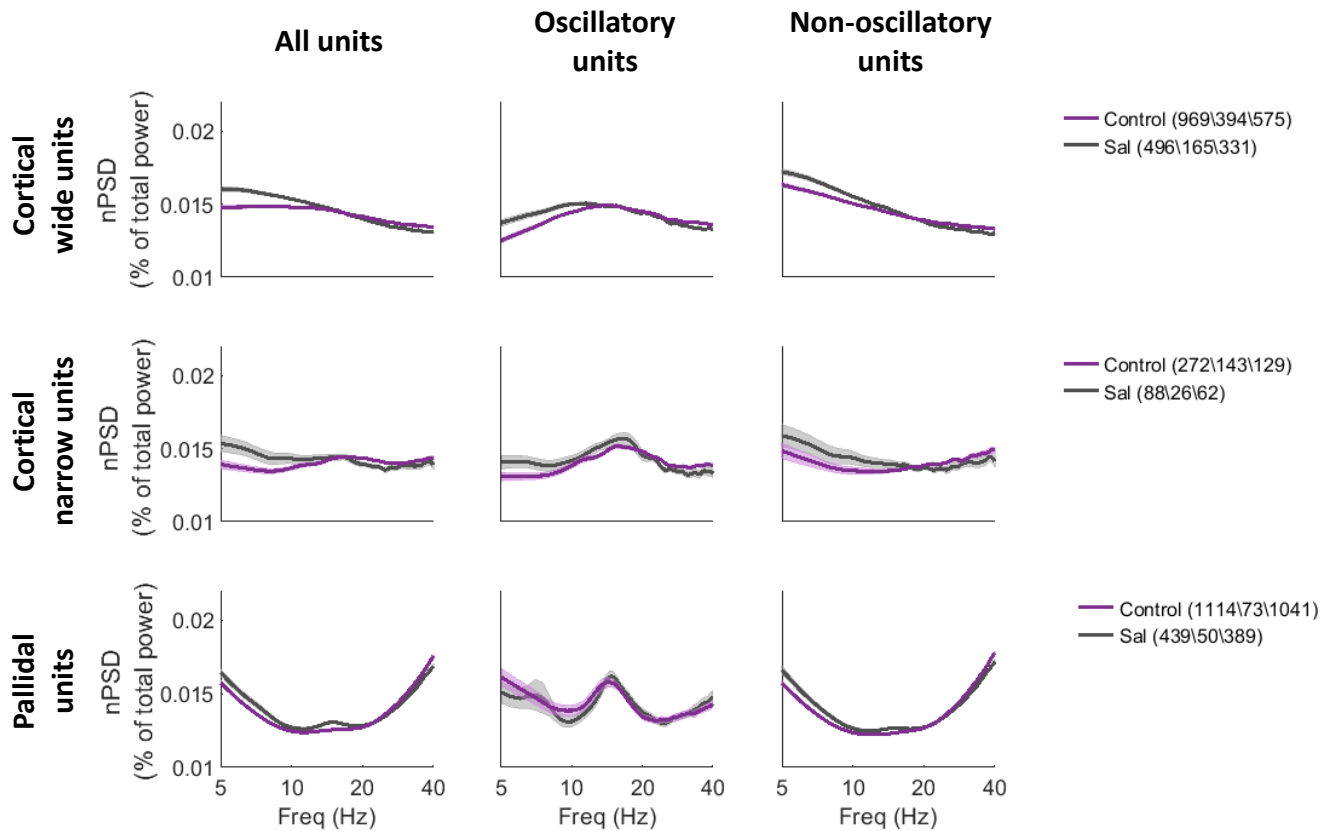

**Supplementary Fig.9. Comparisons of SUA beta activity in drug-naïve and control-saline conditions.** Average normalized PSD (nPSD) of all, oscillatory, and non-oscillatory single units in drug-naïve and control-saline conditions within the cortical wide units, cortical narrow units, and pallidal units. Shadow indicates standard error of the mean. Legend includes counts of all, oscillatory, and non-oscillatory single units for each condition, respectively. Results are detailed in Table-S8. Source data are provided as a Source Data file. nPSD: normalized power spectral density, Freq: frequency, Sal: saline.

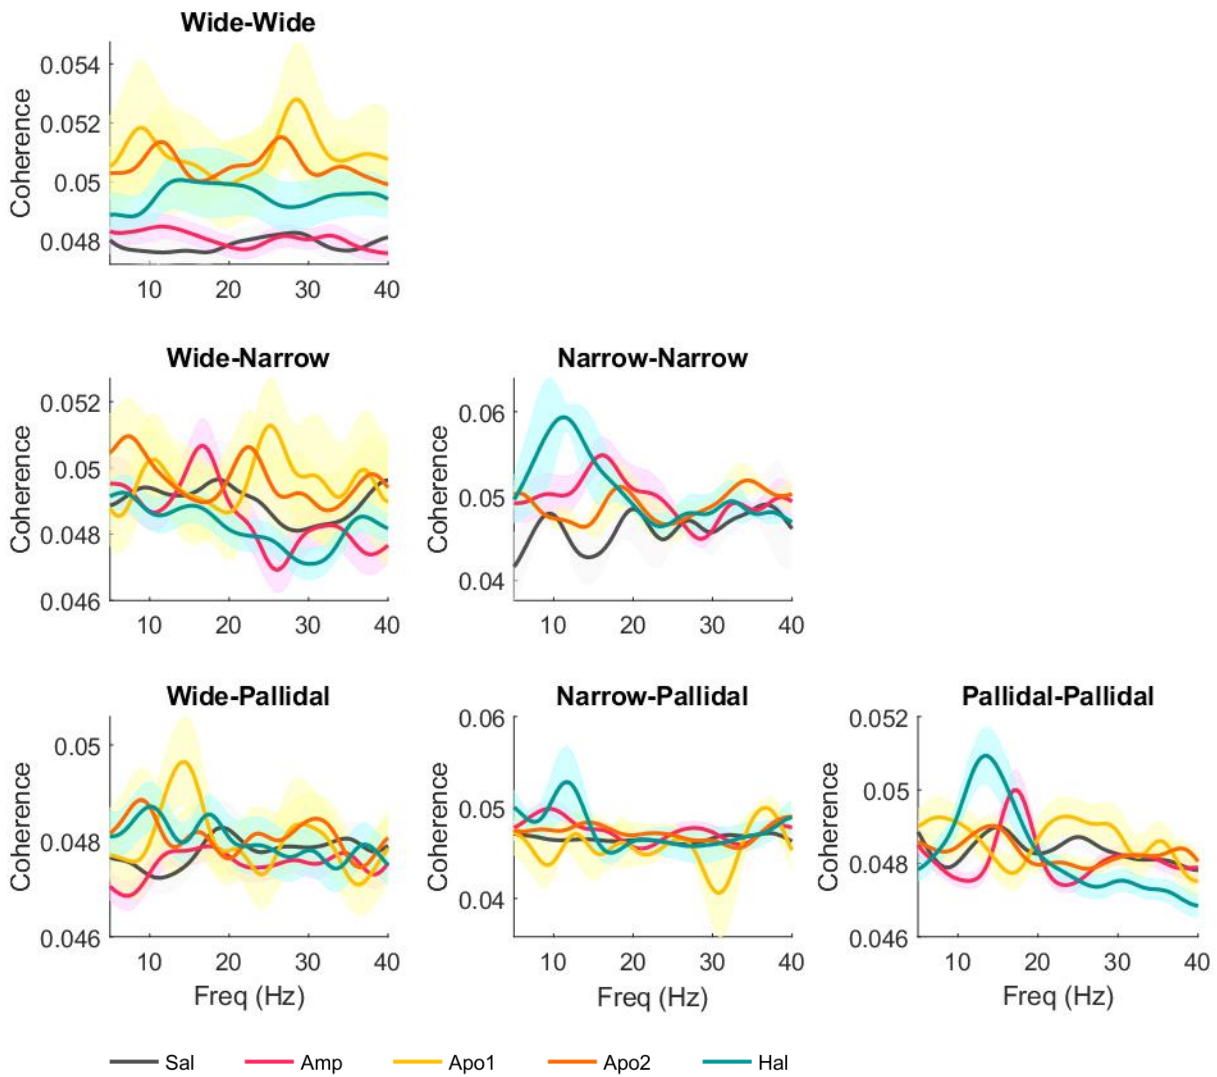

**Supplementary Fig.10: Single unit magnitude-squared coherence in cortical narrow and pallidal pairs shows dopamine tone dependent shifts in beta frequency.** Shadow indicates standard error of the mean. Only unit pairs that were simultaneously recorded for at least five minutes were included in this analysis. Source data are provided as a Source Data file. Freq: frequency, Sal: saline, Amp: amphetamine, Apo: apomorphine, Hal: haloperidol.



$G_{Pe}=480$  LFP pairs. (b) Average PLV during drug influence period (mean $\pm$ STE) (c) Frequency of PLV peaks (mean $\pm$ STE). Beta frequency was increased by Amp and Apo1 and reduced by Apo2 and Hal in dlPFC-dlPFC (Amp:  $p=9.9e-9^a$ , Apo1:  $p=0.007$ , Apo2:  $p=0.019$ , Hal:  $p=9.9e-9^a$ ) GPe-GPe (Amp:  $p=9.9e-9^a$ , Apo1:  $p=9.9e-9^a$ , Hal:  $p=9.9e-9^a$ ) and dlPFC-GPe (Amp:  $p=9.9e-9^a$ , Apo1:  $p=2.9e-4$ , Hal:  $p=1.8e-6$ ) LFP pairs. (d) Overall beta phase locking in the beta range was evaluated as area under the PLV curve (AUC) in 8-24Hz range, and as the PLV peak within 8-24Hz frequency band (mean $\pm$ STE). dlPFC-dlPFC PLV was increased by Amp (AUC:  $p=5.1e-6$ , peak:  $p=2.1e-6$ ) and Hal (AUC:  $p=0.010$ , peak:  $p=0.012$ ). GPe-GPe PLV was increased by Amp (AUC:  $p=7.8e-4$ , peak:  $p=5.3e-6$ ) and Apo1 (AUC:  $p=1.9e-5$ , peak:  $p=2.4e-4$ ). dlPFC-GPe PLV was increased by Amp (peak:  $p=7.6e-4$ ), and Apo1 (AUC:  $p=1.7e-4$ , peak:  $p=0.014$ ). (c-d) Single points indicate individual LFP pairs. Outlier values were excluded from the figure, for presentation purposes. Outlier values were defined as data points exceeding 8 standard deviations above the mean. Drug influence was evaluated by Kruskal-Wallis test followed by post-hoc Tukey test. Test Results are detailed in Table-S10. Source data are provided as a Source Data file. \* $p<0.05$ , \*\* $p<0.01$ , \*\*\* $p<0.001$ , <sup>a</sup>post-hoc p-value resolution was limited to  $9.9e-9$ . PLV: phase locking value, LFP: local field potential, CBG: cortico-basal ganglia, NHP: non-human primate, dlPFC: dorsolateral prefrontal cortex, GPe: globus pallidus pars externa, Sal: saline, Amp: amphetamine, Apo1/2: Apomorphine phase 1/2, Hal: haloperidol

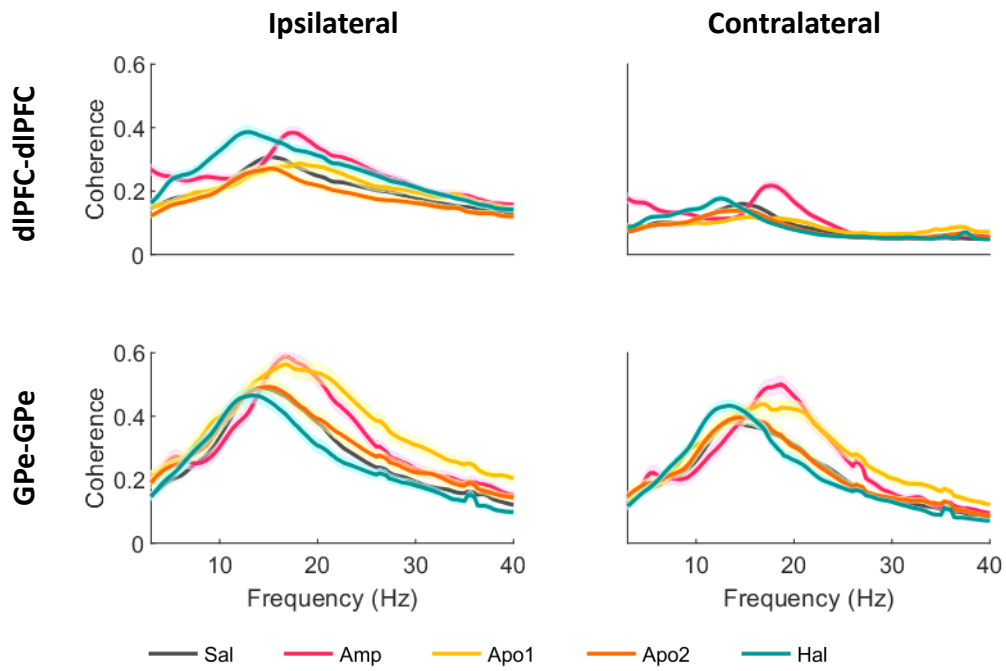

**Supplementary Fig.12: Coherence in the ipsilateral pairs is greater than in the contralateral pairs in the dIPFC, but not in the GPe.** Shadow indicates standard error of the mean. Source data are provided as a Source Data file. dIPFC dorsolateral prefrontal cortex, GPe globus pallidis pars externa, Sal: saline, Amp: amphetamine, Apo: apomorphine, Hal: haloperidol.

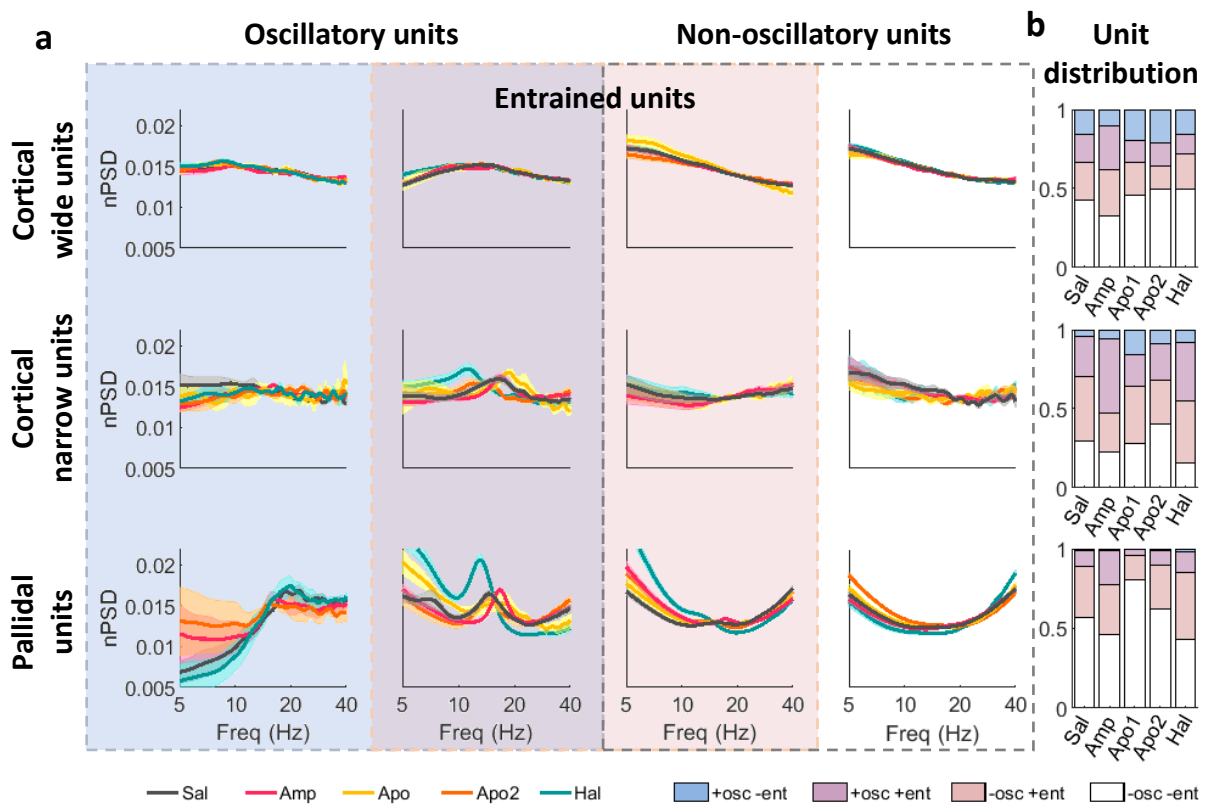

**Supplementary Fig.13. Spectral activity of single units grouped by their oscillatory and LFP-entrainment classification.** Units were classified in two independent processes as oscillatory or not, and as entrained to LFP beta activity or not (see methods). (A) Average normalized PSD (nPSD) of oscillatory and not entrained units (first column), oscillatory and entrained units (second column), non-oscillatory and entrained units (third column), non-oscillatory and not entrained units (fourth column). (B) Distribution of units into the aforementioned groups. Note the higher sensitivity of the entrainment analysis relative to the oscillation analysis. Entrainment analysis was based on LFP phase during spike occurrence, while oscillation analysis was based on beta peak prominence in the power spectrum. Top row: cortical wide units. Middle row: cortical narrow units. Bottom row: pallidal units. Shadow indicates standard error of the mean. Source data are provided as a Source Data file. Sal: saline, Amp: amphetamine, Apo: apomorphine, Hal: haloperidol, nPSD: normalized power spectral density, osc: oscillatory, ent: entrained, freq: frequency.

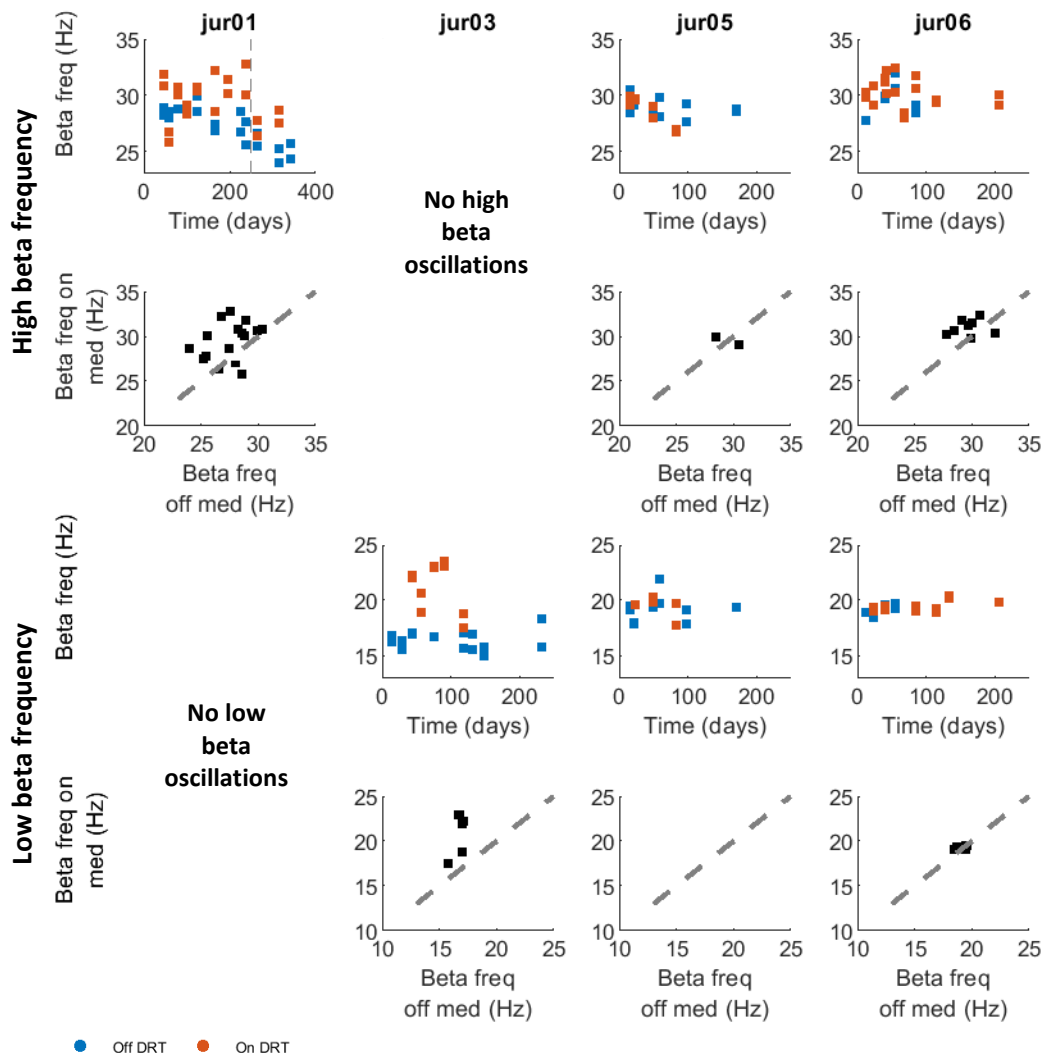

**Supplementary Fig.14. Effect of acute and chronic dopamine modulation on LFP beta frequency in individual patients with PD.** Each column shows data of a single patient. First row: Frequency of beta peak in the high beta domain as a function of time post-surgery. Each point represents average per day of beta peak frequency in one STN on (red) and off (blue) DRT. Second row: Comparison of beta frequency on and off DRT. Each point represents average per day of beta peak frequency in one STN in days with both off and on DRT sessions. X axis – off DRT. Y axis – on DRT. Clustering of data-points above the diagonal line indicates a shift up in beta frequency in the on DRT condition relative to the off DRT condition. Third row: same as first row for low beta domain. Fourth row: same as second row for low beta domain. Patients can exhibit a peak in one or both beta domains. Gray dashed line indicates day 250 post-surgery. Recordings after this day were not included in the model to avoid exaggerated influence of jur01 data on MLEM results. Source data are provided as a Source Data file. freq: frequency, med:medication.

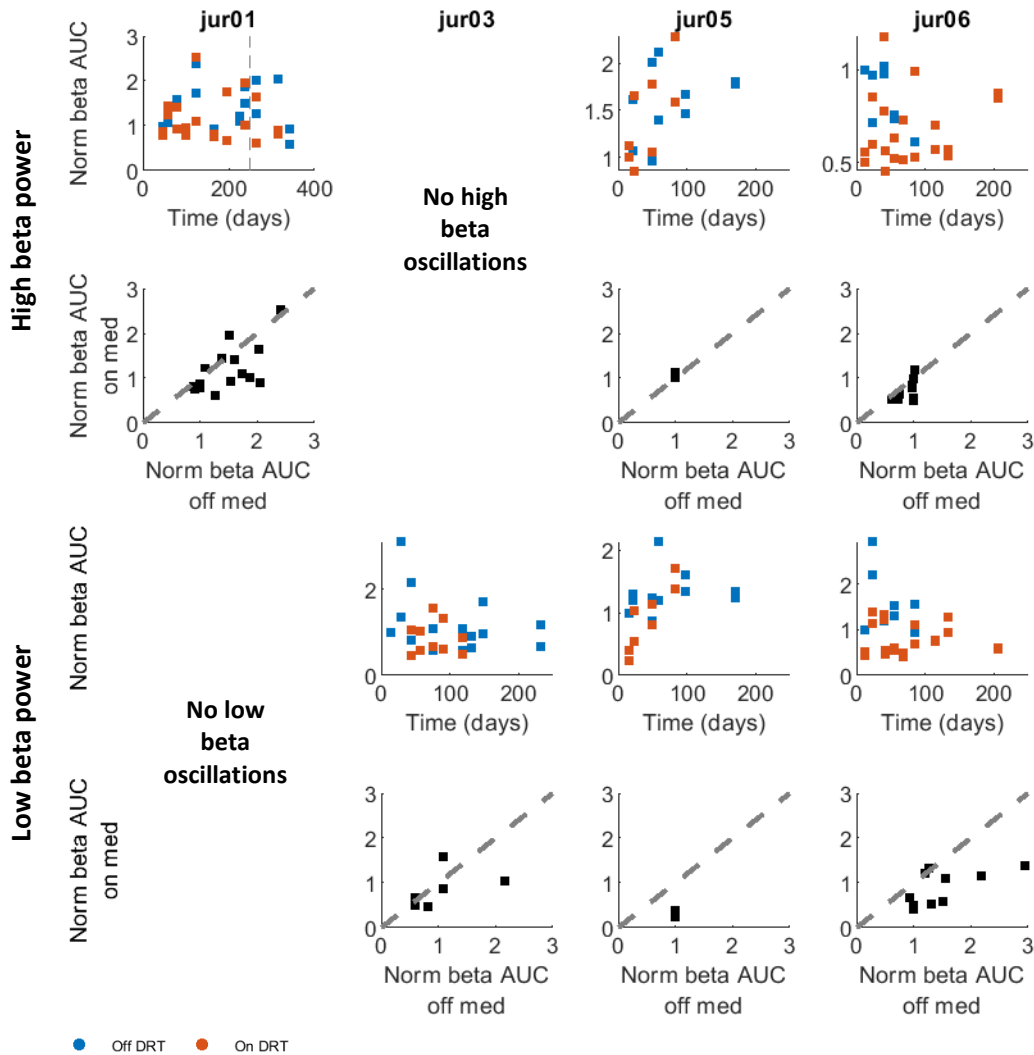

**Fig S15. Effect of acute and chronic dopamine modulation on LFP beta power in individual patients with PD.** Beta power was evaluated as area under the curve (AUC) of the normalized PSD (nPSD) in the high and low beta domains. AUC values were normalized relative to those collected during the first recording day after the surgery. Each column shows data of a single patient. First row: Beta power in the high-beta domain as a function of time post-surgery. Each point represents average per day of high-beta AUC on (red) and off (blue) DRT. Second row: Comparison of beta power on and off DRT. Each point represents average high-beta AUC in days with both off and on DRT sessions. X axis – off DRT. Y axis – on DRT. Clustering of data-points below the diagonal line indicates a decrease in beta power in the on DRT condition relative to the off DRT condition. Third row: same as first row for low beta domain. Fourth row: same as second row for low beta domain. Patients can exhibit a peak in one or both beta domains. Gray dashed line indicates day 250 post-surgery. Recordings after this day were not included in the model to avoid exaggerated influence of jur01 data on MLEM results. Source data are provided as a Source Data file. Norm: normalized, AUC: area under the curve, med: medication.



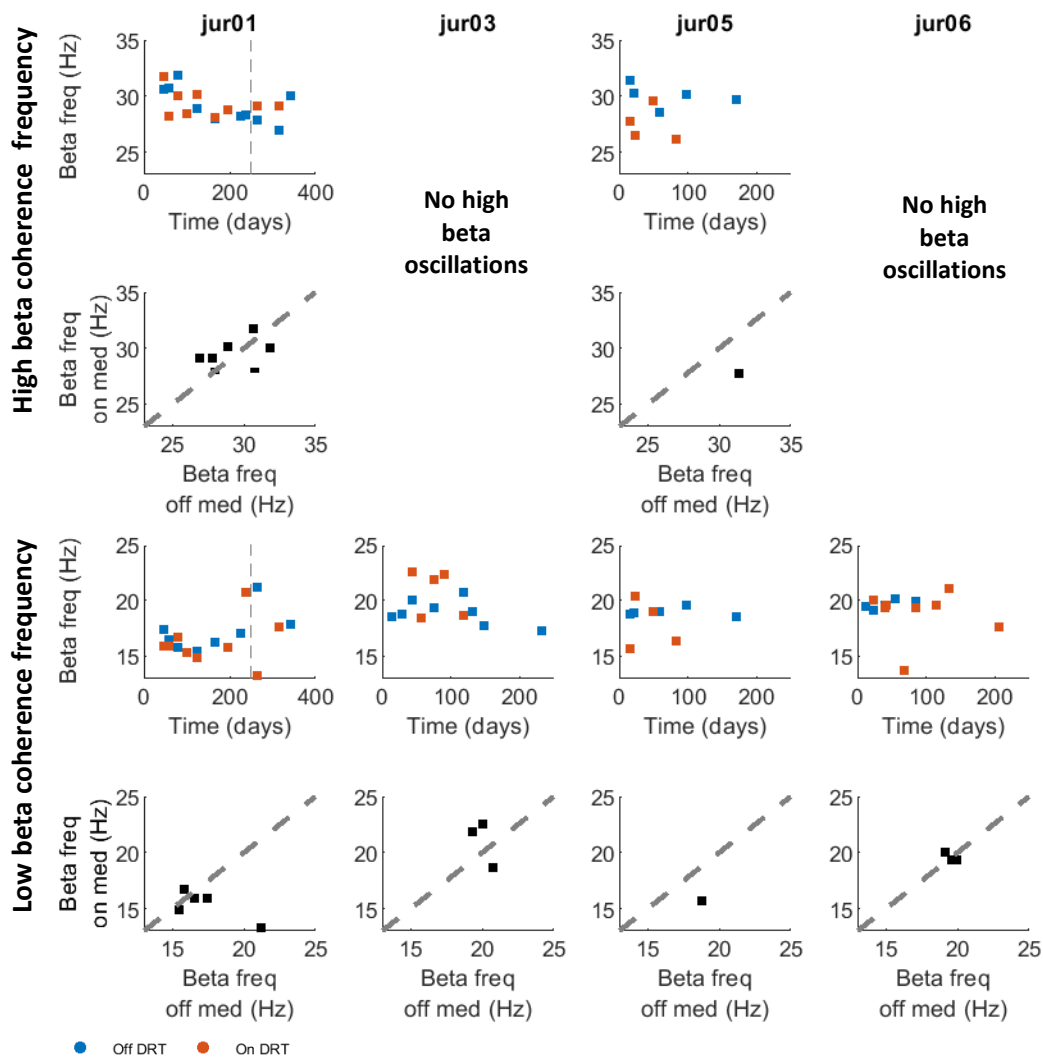

**Supplementary Fig.16. Effect of acute and chronic dopamine modulation on LFP coherence beta frequency in individual patients with PD.** Each column shows data of a single patient. First row: Frequency of beta coherence peak in the high beta domain as a function of time post-surgery. Each point represents average per day of beta coherence peak frequency on (red) and off (blue) DRT. Second row: Comparison of beta coherence frequency on and off DRT. Each dot represents average of beta coherence frequency in the high beta domain in days with both off and on DRT sessions. X axis – off DRT. Y axis – on DRT. Clustering of data-points above the diagonal line indicates a shift up in beta coherence frequency in the on DRT condition relative to the off DRT condition. Third row: same as first row for low beta domain. Fourth row: same as second row for low beta domain. Patients can exhibit a peak in one or both beta domains. Gray dashed line indicates day 250 post-surgery. Recordings after this day were not included in the model to avoid exaggerated influence of jur01 data on MLEM results. Source data are provided as a Source Data file. freq: frequency, med: medication.

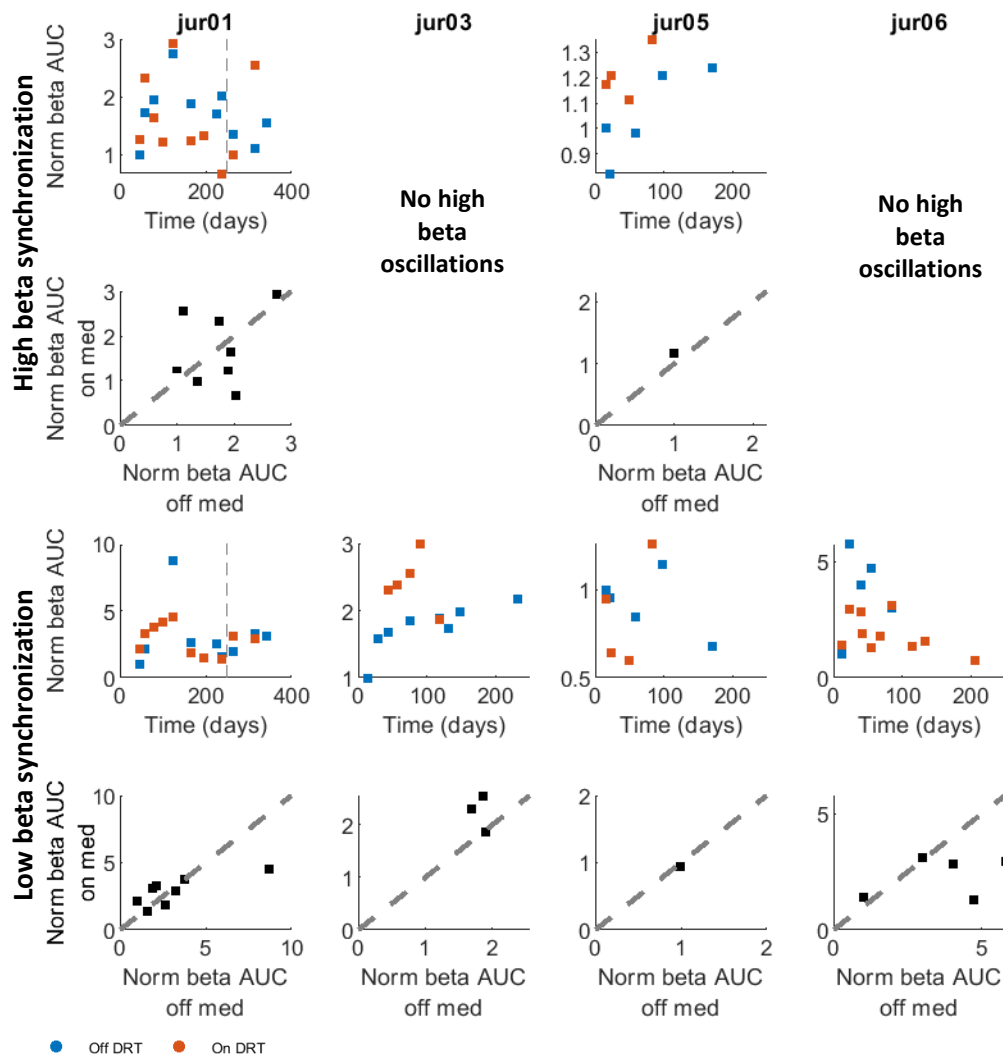

**Supplementary Fig.17. Effect of acute and chronic dopamine modulation on beta synchrony in individual patients with PD.** Beta synchrony is evaluated as area under the curve (AUC) of the coherence in the high and low beta domains. AUC values were normalized relative to those collected during the first recording day after the surgery. Each column shows data of a single patient. First row: Beta synchrony in the high beta domain as a function of time post-surgery. Each point represents average per day of normalized beta AUC on (red) and off (blue) DRT. Second row: Comparison of beta synchrony on and off DRT. Each dot represents average per day of normalized beta AUC in the high-beta domain in days with both off and on DRT sessions. X axis – off DRT. Y axis – on DRT. Clustering of data-points below the diagonal line indicates a decrease in beta synchrony in the on DRT condition relative to the off DRT condition. Third row: same as first row for low beta domain. Fourth row: same as second row for low beta domain. Patients can exhibit a peak in one or both beta domains. Gray dashed line indicates day 250 post-surgery. Recordings after this day were not included in the model to avoid exaggerated influence of jur01 data on MLEM results. Source data are provided as a Source Data file. AUC: area under the curve, med: medication, Norm: normalized.

## Supplementary Tables

a

|              |          |        | Sal | Amp | Apo1 | Apo2 | Hal |
|--------------|----------|--------|-----|-----|------|------|-----|
| LFP sites    | Monkey G | dIPFC  | 54  | 59  | 46   | 47   | 53  |
|              |          | GPe    | 68  | 52  | 55   | 54   | 58  |
|              | Monkey D | dIPFC  | 87  | 58  | 78   | 78   | 51  |
|              |          | GPe    | 58  | 41  | 40   | 40   | 53  |
|              | Total    | dIPFC  | 141 | 117 | 124  | 125  | 104 |
|              |          | GPe    | 126 | 93  | 95   | 94   | 91  |
| Single units | Monkey G | wide   | 198 | 221 | 61   | 153  | 221 |
|              |          | narrow | 27  | 27  | 8    | 19   | 30  |
|              |          | HFD    | 267 | 253 | 72   | 185  | 175 |
|              | Monkey D | wide   | 298 | 154 | 67   | 151  | 191 |
|              |          | narrow | 61  | 47  | 17   | 50   | 32  |
|              |          | HFD    | 172 | 130 | 50   | 137  | 186 |
|              | Total    | wide   | 496 | 375 | 128  | 304  | 412 |
|              |          | narrow | 88  | 74  | 25   | 69   | 62  |
|              |          | HFD    | 439 | 383 | 122  | 322  | 361 |

b

|              |          | naive | MPTP |
|--------------|----------|-------|------|
| LFP sites    | Monkey G | 15    | 15   |
|              | Monkey D | 26    | 9    |
|              | Total    | 41    | 24   |
| Single units | Monkey G | 33    | 35   |
|              | Monkey D | 54    | 53   |
|              | Total    | 87    | 88   |

### Supplementary Table 1. Number of LFP sites and single units in the NHP dataset.

(a) Acute dopamine modulation experiment. (b) Chronic dopamine modulation experiment. LFP: local fields potential, Sal: saline, Amp: amphetamine, Apo: apomorphine, Hal: haloperidol.

| <b>Pts.</b>   | <b>Number of recording days<br/>OFF/ON (both)<br/>DRT</b> | <b>Number of recording sessions<br/>OFF/ON DRT</b> | <b>Number of observations<br/>(sessions*sites)<br/>OFF/ON DRT</b> |
|---------------|-----------------------------------------------------------|----------------------------------------------------|-------------------------------------------------------------------|
| <b>Jur 01</b> | <b>10/11 (8)</b>                                          | <b>13/19</b>                                       | <b>156/228</b>                                                    |
| <b>Jur 03</b> | <b>8/5 (3)</b>                                            | <b>10/6</b>                                        | <b>120/72</b>                                                     |
| <b>Jur 05</b> | <b>6/4 (1)</b>                                            | <b>9/4</b>                                         | <b>81/36</b>                                                      |
| <b>Jur 06</b> | <b>5/10 (5)</b>                                           | <b>11/19</b>                                       | <b>132/228</b>                                                    |
| <b>Total</b>  | <b>29/30 (17)</b>                                         | <b>43/48</b>                                       | <b>489/564</b>                                                    |

**Supplementary Table 2. Patient recording dataset.** Each recording day has either only on DRT recording sessions, only off DRT sessions, or both. In column two, days with on and off sessions are counted both as off day and as an on day. Pts: patients, DRT: dopamine replacement therapy.

a

|                        |      | Sal    | Amp    | Apo1   | Apo2   | Hal   |
|------------------------|------|--------|--------|--------|--------|-------|
| Pupil size             | mean | 0.29   | 0.97   | 0.63   | 0.07   | 0.47  |
|                        | SD   | 0.38   | 0.64   | 0.5    | 0.48   | 0.84  |
| Saccade frequency      | Mean | 1.38   | 3.38   | 1.87   | 1      | 0.13  |
|                        | SD   | 0.73   | 1.27   | 1.19   | 0.69   | 0.15  |
| Saccade amplitude      | mean | 124.36 | 175.85 | 131.55 | 121.12 | 76.25 |
|                        | SD   | 20.96  | 23.22  | 15.33  | 16.72  | 26.18 |
| Eye closed probability | mean | 0.19   | 0.01   | 0.1    | 0.32   | 0.61  |
|                        | SD   | 0.12   | 0.04   | 0.1    | 0.15   | 0.2   |
| Blink frequency        | mean | 12.81  | 10.08  | 24.68  | 12.92  | 11.66 |
|                        | SD   | 4.41   | 5.23   | 6.7    | 5.42   | 5.79  |

b

|                        | F      | df1 | df2 | p value | $\eta^2$ |
|------------------------|--------|-----|-----|---------|----------|
| Pupil size             | 38.78  | 4   | 211 | 2.6e-24 | 0.42     |
| Saccade frequency      | 74.68  | 4   | 218 | 9.0e-40 | 0.58     |
| Saccade amplitude      | 119.94 | 4   | 219 | 5.1e-54 | 0.69     |
| Eye closed probability | 131.24 | 4   | 217 | 9.1e-57 | 0.71     |
| Blink frequency        | 47.13  | 4   | 216 | 1.9e-28 | 0.47     |

c

|      |      | Pupil size    |              | Saccade frequency |              | Saccade amplitude |              | Eye closed probability |              | Blink frequency |              |
|------|------|---------------|--------------|-------------------|--------------|-------------------|--------------|------------------------|--------------|-----------------|--------------|
|      |      | p             | g            | p                 | g            | P                 | g            | p                      | g            | P               | g            |
| Sal  | Amp  | <b>8.3e-8</b> | <b>-1.32</b> | <b>9.9e-9</b>     | <b>-1.99</b> | <b>9.9e-9</b>     | <b>-2.33</b> | <b>1.0e-8</b>          | <b>1.94</b>  | 0.0998          | 0.57         |
| Sal  | Apo1 | <b>0.0319</b> | <b>-0.78</b> | 0.0591            | -0.51        | 0.4346            | -0.38        | <b>0.0140</b>          | <b>0.75</b>  | <b>9.9e-9</b>   | <b>-2.15</b> |
| Sal  | Apo2 | <b>0.0182</b> | <b>0.85</b>  | 0.2169            | 0.54         | 0.9410            | 0.17         | <b>1.2e-5</b>          | <b>-0.97</b> | 1.0000          | -0.02        |
| Sal  | Hal  | <b>1.3e-8</b> | <b>1.26</b>  | <b>1.0e-8</b>     | <b>2.17</b>  | <b>9.9e-9</b>     | <b>2.05</b>  | <b>9.9e-9</b>          | <b>-2.65</b> | 0.8506          | 0.23         |
| Amp  | Apo1 | 0.0579        | 0.58         | <b>9.9e-9</b>     | <b>1.22</b>  | <b>9.9e-9</b>     | <b>2.23</b>  | <b>0.0049</b>          | <b>-1.32</b> | <b>9.9e-9</b>   | <b>-2.41</b> |
| Amp  | Apo2 | <b>9.9e-9</b> | <b>1.81</b>  | <b>9.9e-9</b>     | <b>2.03</b>  | <b>9.9e-9</b>     | <b>2.68</b>  | <b>9.9e-9</b>          | <b>-2.89</b> | 0.1223          | -0.53        |
| Amp  | Hal  | <b>9.9e-9</b> | <b>1.93</b>  | <b>9.9e-9</b>     | <b>3.47</b>  | <b>9.9e-9</b>     | <b>4.00</b>  | <b>9.9e-9</b>          | <b>-4.23</b> | 0.6926          | -0.28        |
| Apo1 | Apo2 | <b>3.3e-7</b> | <b>1.41</b>  | <b>8.5e-5</b>     | <b>0.89</b>  | 0.1465            | 0.64         | <b>9.9e-9</b>          | <b>-1.68</b> | <b>9.9e-9</b>   | <b>1.91</b>  |
| Apo1 | Hal  | <b>9.9e-9</b> | <b>1.60</b>  | <b>9.9e-9</b>     | <b>1.99</b>  | <b>9.9e-9</b>     | <b>2.57</b>  | <b>9.9e-9</b>          | <b>-3.19</b> | <b>9.9e-9</b>   | <b>2.06</b>  |
| Apo2 | Hal  | <b>0.0183</b> | <b>0.59</b>  | <b>1.5e-4</b>     | <b>1.69</b>  | <b>9.9e-9</b>     | <b>2.03</b>  | <b>9.9e-9</b>          | <b>-1.66</b> | 0.8396          | 0.22         |

**Supplementary Table 3. Drug effects on eye physiology.** (a) Descriptive statistics (b) One-way ANOVA test results. Effect size was estimated by  $\eta^2$  measurement (c) Post-hoc results. p: p value, result of Tukey post-hoc test. g: effect size estimated by Hedge's g. Comparisons that did not reach statistical significance and didn't require post-hoc test are marked with a dash. Results are presented in Fig.S2. Source data are provided as a Source Data file. Sal: saline, Amp: amphetamine, Apo: apomorphine, Hal: haloperidol,

**a**

|                         | dlPFC |       |       |       |       |       | GPe   |       |       |       |       |        | STN    |  |
|-------------------------|-------|-------|-------|-------|-------|-------|-------|-------|-------|-------|-------|--------|--------|--|
|                         | Sal   | Amp   | Apo1  | Apo2  | Hal   | Sal   | Amp   | Apo1  | Apo2  | Hal   | naive | MPTP   |        |  |
| LFP beta freq           | mean  | 14.41 | 16.74 | 15.71 | 13.52 | 12.54 | 14.47 | 16.84 | 15.82 | 14.51 | 12.34 | 13.80  | 10.88  |  |
|                         | SD    | 2.8   | 1.48  | 3.5   | 2.25  | 2.95  | 1.72  | 1.07  | 3.08  | 2.18  | 1.08  | 2.44   | 2.13   |  |
| LFP Beta AUC            | mean  | 0.185 | 0.157 | 0.16  | 0.168 | 0.192 | 0.203 | 0.188 | 0.188 | 0.2   | 0.209 | 0.10   | 0.12   |  |
|                         | SD    | 0.046 | 0.038 | 0.04  | 0.046 | 0.047 | 0.055 | 0.055 | 0.063 | 0.05  | 0.023 | 0.028  |        |  |
| LFP beta peak           | mean  | 0.012 | 0.009 | 0.008 | 0.011 | 0.014 | 0.019 | 0.022 | 0.015 | 0.019 | 0.023 | 0.0080 | 0.0149 |  |
|                         | SD    | 0.006 | 0.004 | 0.003 | 0.006 | 0.009 | 0.008 | 0.013 | 0.007 | 0.009 | 0.011 | 0.0035 | 0.0067 |  |
| LFP beta peak (top 20%) | Mean  |       |       |       |       |       |       |       |       |       |       |        |        |  |
|                         | SD    |       |       |       |       |       |       |       |       |       |       |        |        |  |

**b**

|                         | dlPFC         |                |                |             |                |               | GPe            |                |             |                |              |           | STN           |              |               |  |  |  |
|-------------------------|---------------|----------------|----------------|-------------|----------------|---------------|----------------|----------------|-------------|----------------|--------------|-----------|---------------|--------------|---------------|--|--|--|
|                         | $\chi^2$      | df             | p              | $\eta^2$    | BF             | $\chi^2$      | df             | p              | $\eta^2$    | BF             | t            | df        | p             | g            | BF            |  |  |  |
| LFP beta freq           | <b>185.13</b> | <b>(4,522)</b> | <b>5.9e-39</b> | <b>0.23</b> | <b>1.1e+25</b> | <b>228.69</b> | <b>(4,486)</b> | <b>2.5e-48</b> | <b>0.35</b> | <b>2.1e+41</b> | <b>4.27</b>  | <b>43</b> | <b>1.1e-4</b> | <b>1.25</b>  | <b>226.75</b> |  |  |  |
| LFP Beta AUC            | <b>55.54</b>  | <b>(4,606)</b> | <b>2.5e-11</b> | <b>0.09</b> | <b>3.9e+8</b>  | 8.98          | (4,494)        | 0.0616         | 0.02        | 0.071          | -3.28        | <b>63</b> | <b>0.0017</b> | <b>-0.33</b> | <b>16.16</b>  |  |  |  |
| LFP beta peak           | <b>59.36</b>  | <b>(4,606)</b> | <b>3.9e-12</b> | <b>0.12</b> | <b>6.7e+12</b> | <b>30.02</b>  | <b>(4,494)</b> | <b>4.8e-6</b>  | <b>0.07</b> | <b>4.1e+4</b>  | <b>-5.50</b> | <b>63</b> | <b>7.3e-7</b> | <b>-1.4</b>  | <b>2.1e+4</b> |  |  |  |
| LFP beta peak (top 20%) |               |                |                |             |                |               |                |                |             |                |              |           |               |              |               |  |  |  |
|                         |               |                |                |             |                |               |                |                |             |                |              |           |               |              |               |  |  |  |

**c**

|           | dlPFC          |              |                |               |              |               | GPe           |              |               |                |              |                | GPe           |              |               |               |              |               |
|-----------|----------------|--------------|----------------|---------------|--------------|---------------|---------------|--------------|---------------|----------------|--------------|----------------|---------------|--------------|---------------|---------------|--------------|---------------|
|           | LFP beta freq. |              |                | LFP beta AUC  |              |               | LFP beta peak |              |               | LFP beta freq. |              |                | LFP beta AUC  |              |               | LFP beta peak |              |               |
|           | p              | g            | BF             | p             | g            | BF            | p             | g            | BF            | p              | g            | BF             | p             | g            | BF            | p             | g            | BF            |
| Sal Amp   | <b>9.9e-9</b>  | <b>-1.01</b> | <b>3.3e+10</b> | <b>2.5e-6</b> | <b>0.67</b>  | <b>4.6e+4</b> | <b>0.003</b>  | <b>0.56</b>  | <b>1.1e+3</b> | <b>9.9e-9</b>  | <b>-1.60</b> | <b>5.0e+21</b> | 0.8195        | -0.27        | 0.549         | <b>1.6e-4</b> | <b>-1.92</b> | <b>5.1e+4</b> |
| Sal Apo1  | <b>0.023</b>   | <b>-0.41</b> | <b>8.607</b>   | <b>2.8e-5</b> | <b>0.57</b>  | <b>2.1e+3</b> | <b>1.1e-8</b> | <b>0.85</b>  | <b>2.4e+8</b> | <b>0.003</b>   | <b>-0.56</b> | <b>270.43</b>  | <b>0.003</b>  | <b>0.59</b>  | <b>640.63</b> | <b>0.033</b>  | <b>1.73</b>  | <b>8.5e+3</b> |
| Sal Apo2  | 0.061          | 0.34         | 2.406          | <b>0.017</b>  | <b>0.36</b>  | 4.473         | 0.138         | 0.24         | 0.439         | 0.999          | -0.02        | 0.077          | 1.000         | 0.03         | 0.078         | 0.991         | 0.32         | 0.284         |
| Sal Hal   | <b>1.6e-8</b>  | <b>0.65</b>  | <b>1.6e+3</b>  | 0.875         | -0.16        | <b>0.155</b>  | 0.982         | -0.29        | 0.869         | <b>9.9e-9</b>  | <b>1.42</b>  | <b>1.4e+17</b> | 0.3635        | -0.35        | 1.945         | <b>0.002</b>  | <b>-1.45</b> | <b>634.70</b> |
| Amp Apo1  | <b>8.5e-4</b>  | <b>0.38</b>  | <b>3.555</b>   | 0.984         | -0.09        | <b>0.092</b>  | 0.067         | 0.40         | 8.019         | <b>2.4e-4</b>  | <b>0.44</b>  | <b>6.723</b>   | ---           |              |               |               |              |               |
| Amp Apo2  | <b>9.9e-9</b>  | <b>1.69</b>  | <b>6.8e+23</b> | 0.234         | -0.28        | <b>0.741</b>  | 0.696         | -0.29        | 0.874         | <b>9.9e-9</b>  | <b>1.35</b>  | <b>5.7e+13</b> | 0.803         | 0.28         | 0.52          | <b>1.8e-5</b> | <b>3.085</b> | <b>2.3e+9</b> |
| Amp Hal   | <b>9.9e-9</b>  | <b>1.88</b>  | <b>3.7e+24</b> | <b>1.3e-7</b> | <b>-0.85</b> | <b>5.3e+6</b> | <b>9.9e-4</b> | <b>-0.74</b> | <b>9.2e+4</b> | <b>9.9e-9</b>  | <b>4.17</b>  | <b>2.5e+63</b> | 0.957         | -0.05        | 0.087         | 0.977         | 0.27         | 0.244         |
| Apo1 Apo2 | <b>6.9e-7</b>  | <b>0.74</b>  | <b>4.8e+4</b>  | 0.524         | -0.19        | <b>0.224</b>  | <b>6.7e-4</b> | <b>-0.58</b> | <b>1.7e+3</b> | <b>0.004</b>   | <b>0.49</b>  | <b>16.118</b>  | <b>0.010</b>  | <b>-0.52</b> | <b>41.021</b> | <b>0.113</b>  | <b>-2.00</b> | <b>1.1e+5</b> |
| Apo1 Hal  | <b>9.9e-9</b>  | <b>0.97</b>  | <b>1.4e+7</b>  | <b>1.4e-6</b> | <b>-0.75</b> | <b>1.7e+5</b> | <b>1.1e-8</b> | <b>-0.96</b> | <b>1.1e+9</b> | <b>9.9e-9</b>  | <b>1.48</b>  | <b>9.3e+15</b> | <b>5.0e-6</b> | <b>-0.86</b> | <b>5.3e+5</b> | <b>1.0e-8</b> | <b>-3.21</b> | <b>6.6e+9</b> |
| apo2 Hal  | <b>0.003</b>   | <b>0.38</b>  | <b>2.080</b>   | <b>0.001</b>  | <b>-0.52</b> | <b>110.98</b> | 0.056         | -0.48        | 37.882        | <b>1.0e-8</b>  | <b>1.25</b>  | <b>3.5e+11</b> | 0.373         | -0.36        | 1.566         | <b>2.8e-4</b> | <b>-2.16</b> | <b>5.2e+5</b> |

**Supplementary Table 4. Properties of LFP beta oscillations.** (a) Descriptive statistics of LFP beta properties in NHP acute (dlPFC, GPe) and chronic (STN) dopamine modulation experiments (b) Results of Kruskal-Wallis test and two-sided student's t-test for the acute and chronic experiments, respectively.  $\eta^2$  – effect size. (c) Post-hoc comparison results. p: p value, result of Tukey post-hoc test. g: effect size estimated by Hedge's g. BF: Bayes factor. Comparisons that did not reach statistical significance and didn't require post-hoc test are marked with ---. Results are presented in Fig. 2. Source data are provided as a Source Data file. LFP: local field potential, SD: standard deviation; dlPFC dorsolateral prefrontal cortex, GPe: globus pallidus pars externa, Sal: saline, Amp: amphetamine, Apo: apomorphine, Hal: haloperidol, df: degrees of freedom.

| a    |                                   | dIPFC LFP sites | GPe LFP sites | Cortical wide units | Cortical narrow units | Pallidal units |
|------|-----------------------------------|-----------------|---------------|---------------------|-----------------------|----------------|
|      | Oscillatory site/unit probability | sal             | 0.90          | 1.00                | 0.35                  | 0.30           |
| amp  |                                   | 0.94            | 0.99          | 0.38                | 0.53                  | 0.22           |
| apo1 |                                   | 0.81            | 1.00          | 0.34                | 0.36                  | 0.04           |
| apo2 |                                   | 0.83            | 0.97          | 0.36                | 0.32                  | 0.10           |
| hal  |                                   | 0.78            | 0.96          | 0.28                | 0.45                  | 0.15           |

| b    |                                   | STN LFP sites | STN units |
|------|-----------------------------------|---------------|-----------|
|      | Oscillatory site/unit probability | Naïve         | 0.56      |
| MPTP |                                   | 0.875         | 0.57      |

| c            |                 | experiment | X <sup>2</sup> | df           | P value       | Effect size   |
|--------------|-----------------|------------|----------------|--------------|---------------|---------------|
|              | LFP             | dIPFC      | Acute          | <b>16.35</b> | <b>4</b>      | <b>0.0026</b> |
| GPe          |                 | Acute      | <b>9.77</b>    | <b>4</b>     | <b>0.0446</b> | <b>0.14</b>   |
| STN          |                 | Chronic    | <b>6.83</b>    | <b>1</b>     | <b>0.0090</b> | <b>0.32</b>   |
| Single units | Cortical wide   | Acute      | 9.47           | 4            | 0.0505        | 0.07          |
|              | Cortical narrow | Acute      | <b>11.70</b>   | <b>4</b>     | <b>0.0197</b> | <b>0.19</b>   |
|              | Pallidal        | Acute      | <b>38.75</b>   | <b>4</b>     | <b>7.8e-8</b> | <b>0.15</b>   |
|              | Subthalamic     | Chronic    | <b>19.38</b>   | <b>1</b>     | <b>1.1e-5</b> | <b>0.33</b>   |

| d |      | dIPFC |               | GPe          |        | Cortical wide units |     | Cortical narrow units |              | Pallidal units |              |
|---|------|-------|---------------|--------------|--------|---------------------|-----|-----------------------|--------------|----------------|--------------|
|   |      | p     | Φ             | p            | Φ      | p                   | Φ   | p                     | Φ            | p              | Φ            |
|   | sal  | amp   | 1.0000        | -0.07        | 1.0000 | 0.08                | --- | <b>0.0274</b>         | <b>-0.24</b> | <b>3.0e-4</b>  | <b>-0.15</b> |
|   | sal  | apo1  | 0.4339        | -0.12        | --     | --                  |     | 1.0000                | 0.06         | 0.1659         | -0.10        |
|   | sal  | apo2  | 0.9802        | -0.10        | 0.4347 | -0.14               |     | 1.0000                | 0.03         | 1.0000         | -0.02        |
|   | sal  | hal   | 0.0846        | 0.17         | 0.1753 | -0.16               |     | 0.4975                | -0.16        | 1.0000         | 0.06         |
|   | amp  | apo1  | <b>0.0315</b> | <b>-0.19</b> | 1.0000 | 0.07                |     | 1.0000                | -0.15        | 1.0e-4         | -0.20        |
|   | amp  | apo2  | 0.0857        | -0.17        | 1.0000 | -0.07               |     | 0.1189                | -0.21        | 1.0e-4         | -0.16        |
|   | amp  | hal   | <b>0.0047</b> | <b>-0.24</b> | 1.0000 | -0.10               |     | 1.0000                | -0.08        | 0.1523         | -0.09        |
|   | apo1 | apo2  | 1.0000        | 0.02         | 0.7922 | -0.13               |     | 1.0000                | 0.04         | 0.4688         | -0.09        |
|   | apo1 | hal   | 1.0000        | 0.04         | 0.3885 | -0.15               |     | 1.0000                | -0.08        | 0.0126         | 0.15         |
|   | apo2 | hal   | 1.0000        | 0.07         | 1.0000 | -0.03               |     | 1.0000                | -0.14        | 0.3818         | 0.08         |

**Supplementary Table 5. Probability of oscillatory LFP sites/single units. (a)**

Descriptive statistics, acute dopamine modulation experiment. (b) Descriptive statistics, chronic dopamine modulation experiment. (c) Chi-square test results. Effect size was estimated by Cramer's V for the acute modulation experiment, and  $\Phi$  for the chronic modulation experiment (d) Results of post-hoc comparison with Bonferroni correction for multiple comparisons. p: p-value of 2x2 Chi-square test with drug condition and oscillation status (oscillatory vs non-oscillatory) as factors.  $\Phi$ : effect size. Results are presented in Figures S3 (LFP) and S7 (SUA). Source data are provided as a Source Data file. LFP: local field potential, dIPFC dorsolateral prefrontal cortex, GPe globus pallidus pars externa, STN: subthalamic nucleus, Sal: saline, Amp: amphetamine, Apo: apomorphine, Hal: haloperidol.

a

|       |                |                | F      | DF      | sig     | Partial $\eta^2$ |
|-------|----------------|----------------|--------|---------|---------|------------------|
| dIPFC | Beta frequency | Eye state      | 21.486 | (1,137) | 8.0e-6  | 0.136            |
|       |                | Drug           | 4.811  | (4,137) | 0.001   | 0.123            |
|       |                | Eye state*drug | 5.912  | (4,137) | 2.0e-4  | 0.147            |
| GPe   | Beta frequency | Eye state      | 48.392 | (1,181) | 6.2e-11 | 0.211            |
|       |                | Drug           | 5.931  | (4,181) | 1.6e-4  | 0.116            |
|       |                | Eye state*drug | 21.820 | (4,181) | 1.0e-14 | 0.325            |
| dIPFC | Beta peak      | Eye state      | 0.791  | (1,560) | 0.374   | 0.001            |
|       |                | Drug           | 7.995  | (4,560) | 3.0e-6  | 0.054            |
|       |                | Eye state*drug | 19.597 | (4,560) | 4.1e-15 | 0.123            |
| GPe   | Beta peak      | Eye state      | 9.768  | (1,409) | 0.002   | 0.023            |
|       |                | Drug           | 7.418  | (4,409) | 9.0e-6  | 0.068            |
|       |                | Eye state*drug | 13.034 | (4,409) | 5.3e-10 | 0.113            |
| dIPFC | Beta AUC       | Eye state      | 50.084 | (1,560) | 4.4e-12 | 0.082            |
|       |                | Drug           | 7.127  | (4,560) | 1.3e-5  | 0.048            |
|       |                | Eye state*drug | 6.713  | (4,560) | 2.8e-5  | 0.046            |
| GPe   | Beta AUC       | Eye state      | 18.158 | (1,409) | 2.5e-5  | 0.043            |
|       |                | Drug           | 4.648  | (4,409) | 0.001   | 0.043            |
|       |                | Eye state*drug | 13.189 | (4,409) | 4.1e-10 | 0.114            |

b

| Drug |   | dIPFC          |      |         |           |      |         |          |      |         | GPe            |      |         |           |      |         |          |      |         |
|------|---|----------------|------|---------|-----------|------|---------|----------|------|---------|----------------|------|---------|-----------|------|---------|----------|------|---------|
|      |   | Beta frequency |      |         | Beta peak |      |         | Beta AUC |      |         | Beta frequency |      |         | Beta peak |      |         | Beta AUC |      |         |
|      |   | mean           | ste  | P (o-c) | mean      | Ste  | P (o-c) | mean     | ste  | P (o-c) | mean           | Ste  | P (o-c) | mean      | ste  | P (o-c) | mean     | ste  | P (o-c) |
| Sal  | o | 14.45          | 0.47 | 0.035   | .010      | .001 | 0.570   | .153     | .004 | 2.1e-5  | 15.25          | 0.28 | 6.2e-16 | .015      | .002 | 0.078   | .166     | .005 | 6.2e-15 |
|      | c | 13.48          | 0.62 |         | .009      | .001 |         | .163     | .004 |         | 13.25          | 0.31 |         | .014      | .001 |         | .184     | .005 |         |
| Amp  | o | 17.08          | 0.60 | 2.1e-5  | .007      | .001 | 8.3e-11 | .124     | .007 | 7.8e-5  | 18.50          | 1.12 | 0.162   | .009      | .001 | 0.327   | .129     | .012 | 0.330   |
|      | c | 14.50          | 0.79 |         | .011      | .001 |         | .138     | .006 |         | 17.25          | 1.22 |         | .010      | .001 |         | .124     | .011 |         |
| Apo1 | o | 15.92          | 0.55 | 4.0e-4  | .007      | .001 | 0.098   | .136     | .005 | 1.6e-10 | 16.78          | 0.32 | 7.5e-28 | .012      | .001 | 0.020   | .165     | .006 | 6.5e-9  |
|      | c | 13.97          | 0.72 |         | .008      | .001 |         | .152     | .004 |         | 13.46          | 0.35 |         | .013      | .001 |         | .181     | .006 |         |
| Apo2 | o | 13.88          | 0.52 | 0.145   | .009      | .001 | 4.5e-4  | .140     | .005 | 0.397   | 14.99          | 0.34 | 2.2e-5  | .017      | .001 | 7.4e-11 | .178     | .006 | 0.333   |
|      | c | 13.14          | 0.69 |         | .007      | .001 |         | .142     | .004 |         | 13.79          | 0.38 |         | .013      | .001 |         | .175     | .006 |         |
| Hal  | o | 12.01          | 0.47 | 0.102   | .012      | .001 | 1.0e-5  | .163     | .004 | 0.711   | 13.02          | 0.42 | 0.159   | .019      | .001 | 2.0e-6  | .178     | .006 | 0.081   |
|      | c | 12.85          | 0.62 |         | .010      | .001 |         | .164     | .004 |         | 13.50          | 0.46 |         | .016      | .001 |         | .183     | .006 |         |

**Supplementary Table 6. Beta properties as a function of drug condition and eye-state.** (a) Two-way mixed-design ANOVA results with beta properties as dependent factors, drug condition as between-observation independent factor, and eye-state as within-observation independent factor. Eye state\*drug marks the interaction effect. The test was conducted separately for each beta property. Only sites that were oscillatory in both eye-state conditions were included in the beta frequency analysis. (b) Post-hoc results. Post-hoc test compared the beta properties between the two eye-states (open vs closed) within each drug condition, and used Bonferroni correction for multiple comparisons. Source data are provided as a Source Data file. o: open; c: closed; STE: standard error of the mean. dIPFC dorsolateral prefrontal cortex, GPe globus pallidus pars externa, Sal: saline, Amp: amphetamine, Apo: apomorphine, Hal: haloperidol, AUC: area under the curve, F: frequency, DF: degrees of freedom; o-c: open-closed, sig: significance



**a**

|                      | Cortical wide units |        |        |        |        | Cortical narrow units |        |        |        |        | Pallidal units |        |        |        |        | STN units |        |        |
|----------------------|---------------------|--------|--------|--------|--------|-----------------------|--------|--------|--------|--------|----------------|--------|--------|--------|--------|-----------|--------|--------|
|                      | sal                 | amp    | apo1   | apo2   | hal    | sal                   | amp    | apo1   | apo2   | hal    | sal            | amp    | apo1   | apo2   | hal    | Native    | MPrP   |        |
| Firing rate          | Mean                | 2.50   | 3.10   | 2.18   | 2.18   | 2.33                  | 7.59   | 6.61   | 9.05   | 7.12   | 9.51           | 59.02  | 66.32  | 74.53  | 60.08  | 52.17     | 23.50  | 29.95  |
|                      | SD                  | 2.86   | 3.06   | 2.35   | 2.41   | 2.45                  | 6.28   | 5.41   | 8.32   | 6.55   | 6.72           | 24.89  | 31.12  | 26.55  | 24.45  | 25.45     | 11.72  | 17.26  |
| SUA beta freq. (osc) | Mean                | 14.18  | 14.71  | 15.36  | 14.38  | 13.71                 | 16.73  | 15.82  | 18.17  | 14.2   | 12.7           | 15.87  | 17.04  | 17.80  | 14.84  | 13.65     | 17.49  | 11.52  |
|                      | SD                  | 4.27   | 4.50   | 4.71   | 4.60   | 4.30                  | 4.45   | 3.69   | 3.19   | 3.5    | 3.13           | 2.59   | 1.66   | 3.82   | 1.82   | 1.86      | 4.06   | 2.72   |
| SUA beta freq. (all) | Mean                | 16.04  | 16.33  | 16.43  | 15.91  | 16.23                 | 16.62  | 16.88  | 18.56  | 16.08  | 14.42          | 16.79  | 17.34  | 17.51  | 16.76  | 15.84     | 17.36  | 14.09  |
|                      | SD                  | 4.53   | 4.66   | 4.78   | 4.53   | 4.66                  | 4.48   | 4.34   | 4.05   | 4.53   | 4.60           | 3.52   | 2.98   | 3.72   | 3.66   | 4.25      | 3.94   | 4.98   |
| SUA beta AUC         | Mean                | 0.078  | 0.078  | 0.081  | 0.08   | 0.08                  | 0.071  | 0.071  | 0.07   | 0.066  | 0.072          | 0.043  | 0.043  | 0.033  | 0.04   | 0.045     | 0.021  | 0.024  |
|                      | SD                  | 0.016  | 0.012  | 0.016  | 0.015  | 0.016                 | 0.017  | 0.006  | 0.014  | 0.011  | 0.017          | 0.013  | 0.013  | 0.01   | 0.012  | 0.017     | 0.005  | 0.007  |
| SUA beta peak        | Mean                | 0.0028 | 0.0028 | 0.003  | 0.0029 | 0.0029                | 0.0026 | 0.0026 | 0.0026 | 0.0024 | 0.0028         | 0.0014 | 0.0015 | 0.0011 | 0.0013 | 0.0016    | 0.0014 | 0.0019 |
|                      | SD                  | 0.0007 | 0.0005 | 0.0008 | 0.0007 | 0.0008                | 0.0009 | 0.0005 | 0.0006 | 0.0005 | 0.0009         | 0.0006 | 0.0004 | 0.0004 | 0.0005 | 0.0009    | 0.0004 | 0.0009 |

**b**

|                      | Cortical wide units |                 |               |              |              | Cortical narrow units |                |               |              |               | Pallidal units |                 |                |             |                | STN units    |            |                |              |               |
|----------------------|---------------------|-----------------|---------------|--------------|--------------|-----------------------|----------------|---------------|--------------|---------------|----------------|-----------------|----------------|-------------|----------------|--------------|------------|----------------|--------------|---------------|
|                      | $\chi^2$            | df              | p             | $\eta^2$     | BF           | $\chi^2$              | df             | p             | $\eta^2$     | BF            | $\chi^2$       | df              | p              | $\eta^2$    | BF             | t            | df         | p              | g            | BF            |
| Firing rate          | <b>31.56</b>        | <b>(4,1710)</b> | <b>2.4e-6</b> | <b>0.008</b> | <b>24.44</b> | 7.78                  | (4,313)        | 0.1001        | 0.022        | 23.94         | <b>80.94</b>   | <b>(4,1622)</b> | <b>1.1e-16</b> | <b>0.05</b> | <b>24.14</b>   | <b>-2.89</b> | <b>173</b> | <b>0.0043</b>  | <b>-0.44</b> | <b>4.68</b>   |
| SUA beta freq. (osc) | 5.58                | (4,570)         | 0.2330        | 0.010        | 7.5e-3       | <b>23.76</b>          | <b>(4,119)</b> | <b>8.9e-5</b> | <b>0.179</b> | <b>1.7e+2</b> | <b>105.52</b>  | <b>(4,222)</b>  | <b>6.6e-22</b> | <b>0.32</b> | <b>1.8e+15</b> | <b>7.25</b>  | <b>69</b>  | <b>4.6e-10</b> | <b>1.87</b>  | <b>2.3e+7</b> |
| SUA beta freq. (all) | 2.35                | (4,1681)        | 0.6715        | 0.001        | 2.0e-4       | <b>18.35</b>          | <b>(4,298)</b> | <b>0.001</b>  | <b>0.059</b> | <b>5.6</b>    | <b>52.36</b>   | <b>(4,1495)</b> | <b>1.2e-10</b> | <b>0.02</b> | <b>1.6e+3</b>  | <b>4.77</b>  | <b>169</b> | <b>4.0e-6</b>  | <b>0.73</b>  | <b>3.1e+3</b> |
| SUA Beta AUC         | 5.59                | (4,1710)        | 0.2316        | 0.005        | 3.6e-3       | <b>12.66</b>          | <b>(4,313)</b> | <b>0.0130</b> | <b>0.024</b> | <b>0.046</b>  | <b>76.72</b>   | <b>(4,1622)</b> | <b>8.6e-16</b> | <b>0.05</b> | <b>2.3e+12</b> | <b>-2.38</b> | <b>173</b> | <b>0.0186</b>  | <b>-0.36</b> | <b>1.30</b>   |
| SUA beta peak        | <b>11.72</b>        | <b>(4,1710)</b> | <b>0.0196</b> | <b>0.008</b> | <b>0.045</b> | 8.23                  | (4,313)        | 0.0834        | 0.025        | 0.060         | <b>64.29</b>   | <b>(4,1622)</b> | <b>3.6e-13</b> | <b>0.04</b> | <b>8.4e+8</b>  | <b>-4.85</b> | <b>173</b> | <b>2.7e-6</b>  | <b>-0.73</b> | <b>4.5e+3</b> |

**c**

|      | Cortical wide units |                      |                      |              |               | Cortical narrow units |                      |                      |              |               | Pallidal units |                      |                      |              |               |      |        |       |         |        |       |         |        |             |               |              |       |        |        |       |        |
|------|---------------------|----------------------|----------------------|--------------|---------------|-----------------------|----------------------|----------------------|--------------|---------------|----------------|----------------------|----------------------|--------------|---------------|------|--------|-------|---------|--------|-------|---------|--------|-------------|---------------|--------------|-------|--------|--------|-------|--------|
|      | Firing rate         | SUA beta freq. (osc) | SUA beta freq. (all) | SUA beta AUC | SUA beta peak | Firing rate           | SUA beta freq. (osc) | SUA beta freq. (all) | SUA beta AUC | SUA beta peak | Firing rate    | SUA beta freq. (osc) | SUA beta freq. (all) | SUA beta AUC | SUA beta peak |      |        |       |         |        |       |         |        |             |               |              |       |        |        |       |        |
| Sal  | Amp                 | 2.8e-4               | -0.14                | 0.30         | 0.965         | 0.10                  | 0.11                 | 0.988                | 0.22         | 0.20          | 0.996          | -0.06                | 0.10                 | 0.324        | 0.05          | 0.09 | 0.023  | -0.22 | 4.997   | 8.6e-4 | -0.57 | 11.7    | 0.013  | -0.17       | 0.61          | 0.9975       | -0.01 | 0.04   | 0.527  | -0.08 | 0.07   |
| Sal  | Apo1                | 0.686                | 0.11                 | 0.09         | 0.338         | -0.20                 | 0.35                 | 0.769                | -0.34        | 0.26          | 0.338          | -0.44                | 0.61                 | 1.000        | 0.06          | 0.11 | 9.4e-7 | -0.55 | 5.5e+4  | 0.692  | -0.70 | 0.44    | 0.224  | -0.20       | 0.31          | 9.9e-9       | 0.75  | 6.3e+9 | 1.2e-8 | 0.61  | 1.5e+6 |
| Sal  | Apo2                | 0.872                | 0.08                 | 0.07         | 0.119         | -0.13                 | 0.20                 | 0.177                | 0.61         | 1.30          | 0.965          | 0.12                 | 0.12                 | 0.361        | 0.35          | 0.94 | 0.982  | -0.03 | 0.045   | 0.276  | 0.44  | 0.745   | 0.998  | 0.01        | 0.04          | 0.017        | 0.25  | 12.13  | 0.040  | 0.22  | 3.02   |
| Sal  | Hal                 | 1.000                | 0.03                 | 0.04         | 0.996         | -0.05                 | 0.05                 | 0.003                | <b>1.04</b>  | <b>82.8</b>   | <b>0.033</b>   | <b>0.48</b>          | <b>4.61</b>          | <b>0.993</b> | -0.02         | 0.09 | 6.0e-4 | 0.29  | 188.95  | 2.4e-6 | 0.99  | 8.8e+3  | 6.3e-4 | 0.25        | 9.15          | 0.6135       | -0.17 | 0.70   | 0.994  | -0.20 | 1.86   |
| Amp  | Apo1                | 4.7e-4               | 0.29                 | 2.68         | 0.163         | -0.34                 | 13.11                | 0.524                | -0.64        | 0.66          | 0.514          | -0.39                | 0.43                 | 0.758        | 0.04          | 0.11 | 0.010  | -0.27 | 1.621   | 1.000  | -0.42 | 0.18    | 1.000  | -0.05       | 0.06          | 9.9e-9       | 0.73  | 6.6e+8 | 9.9e-9 | 0.67  | 1.9e+7 |
| Amp  | Apo2                | 3.9e-5               | 0.24                 | 6.32         | 0.037         | -0.26                 | 10.52                | 0.300                | 0.44         | 0.52          | 0.853          | 0.18                 | 0.16                 | 0.004        | 0.50          | 6.46 | 0.166  | 0.19  | 0.938   | 3.0e-7 | 1.28  | 1.2e+6  | 0.011  | 0.18        | 0.53          | 0.009        | 0.25  | 9.05   | 3.0e-4 | 0.29  | 61.15  |
| Amp  | Hal                 | 5.5e-4               | 0.19                 | 1.32         | 0.860         | -0.14                 | 0.31                 | 0.005                | 0.89         | <b>44.8</b>   | <b>0.014</b>   | <b>0.55</b>          | <b>10.90</b>         | <b>0.685</b> | -0.09         | 0.11 | 1.0e-8 | 0.49  | 9.9e+7  | 9.9e-9 | 1.94  | 1.8e+18 | 1.0e-8 | <b>0.41</b> | <b>4.5e+4</b> | <b>0.825</b> | 0.43  | 0.8135 | -0.13  | 0.203 |        |
| Apo1 | Apo2                | 0.980                | -0.05                | 0.06         | 1.000         | 0.08                  | 0.07                 | 0.046                | 1.13         | 6.45          | 0.153          | 0.56                 | 1.60                 | 0.659        | 0.34          | 0.33 | 1.9e-5 | 0.52  | 6.0e+3  | 0.177  | 1.35  | 5.81    | 0.173  | 0.20        | 0.31          | 2.4e-5       | -0.54 | 1.4e+4 | 3.2e-4 | -0.44 | 202.1  |
| Apo1 | Hal                 | 0.709                | -0.11                | 0.09         | 0.514         | 0.15                  | 0.14                 | 0.002                | 1.70         | 374.5         | 0.001          | 0.92                 | 90.8                 | 1.000        | -0.09         | 0.13 | 9.9e-9 | 0.87  | 4.0e+12 | 0.005  | 2.00  | 356.86  | 1.9e-5 | 0.41        | 49.83         | 9.9e-9       | -0.77 | 5.1e+9 | 1.1e-8 | -0.60 | 3.3e+5 |
| Apo2 | Hal                 | 0.892                | -0.06                | 0.06         | 0.285         | 0.08                  | 0.07                 | 0.763                | 0.45         | 0.51          | 0.208          | 0.36                 | 0.74                 | 0.226        | -0.40         | 1.21 | 2.2e-4 | 0.33  | 366.6   | 0.09   | 0.65  | 6.26    | 0.006  | 0.23        | 2.75          | 1.9e-4       | -0.38 | 9.1e+3 | 0.018  | -0.36 | 1.9e+3 |

**Table S7. Firing rate and beta properties of single unit activity.** (a) Descriptive statistics of single unit properties in NHP acute (cortical and pallidal units) and chronic (STN units) dopamine modulation experiments (b) Results of Kruskal-Wallis test and two-sided student's t-test for the acute and chronic modulation experiments, respectively.  $\eta^2$  – effect size. (c) Post-hoc comparison results. p - p value, result of Tukey post-hoc test. g – effect size estimated by Hedge's g. BF: Bayes factor. Comparisons that did not reach statistical significance and didn't require post-hoc test are marked with ---. Results are presented in Fig. 3 and Fig. S6. Source data are provided as a Source Data file. SUA: single unit activity, AUC: area under the curve, osc: oscillatory, dlPFC dorsolateral prefrontal cortex, GPe globus pallidus pars externa, Sal: saline, Amp: amphetamine, Apo: apomorphine, Hal: haloperidol

**a**

|                      | LFP        |        |            |        | Single units  |        |                 |        |            |        |
|----------------------|------------|--------|------------|--------|---------------|--------|-----------------|--------|------------|--------|
|                      | dlPFC      |        | GPe        |        | Cortical wide |        | Cortical narrow |        | Pallidal   |        |
|                      | drug naive | Sal    | Drug naive | Sal    | Drug naive    | Sal    | Drug naive      | Sal    | Drug naive | Sal    |
| SUA beta freq. (osc) | Mean       | 16.77  | 14.41      | 15.69  | 14.47         | 15.20  | 14.18           | 16.65  | 16.73      | 15.32  |
|                      | SD         | 2.93   | 2.80       | 2.38   | 1.72          | 4.38   | 4.27            | 3.95   | 4.45       | 3.02   |
| SUA beta freq. (all) | Mean       | 16.77  | 14.41      | 15.66  | 14.47         | 16.40  | 16.04           | 16.95  | 16.62      | 16.58  |
|                      | SD         | 2.93   | 2.80       | 2.41   | 1.72          | 4.55   | 4.53            | 4.38   | 4.48       | 16.79  |
| SUA beta AUC         | Mean       | 0.186  | 0.185      | 0.191  | 0.203         | 0.077  | 0.078           | 0.071  | 0.071      | 0.040  |
|                      | SD         | 0.040  | 0.046      | 0.059  | 0.055         | 0.013  | 0.0155          | 0.014  | 0.017      | 0.013  |
| SUA beta peak        | Mean       | 0.0105 | 0.0123     | 0.0181 | 0.0194        | 0.0028 | 0.0028          | 0.0026 | 0.0026     | 0.0013 |
|                      | SD         | 0.0052 | 0.0062     | 0.0109 | 0.0084        | 0.0006 | 0.0007          | 0.0008 | 0.0009     | 0.0005 |

**b**

|                      | LFP           |            |               |             | Single units  |            |                 |             |             |             |               |             |
|----------------------|---------------|------------|---------------|-------------|---------------|------------|-----------------|-------------|-------------|-------------|---------------|-------------|
|                      | dlPFC         |            | GPe           |             | Cortical wide |            | Cortical narrow |             | Pallidal    |             |               |             |
|                      | t             | df         | p             | g           | t             | df         | p               | g           | t           | df          | p             | g           |
| SUA beta freq. (osc) | <b>6.30</b>   | <b>232</b> | <b>1.5e-9</b> | <b>0.82</b> | <b>5.17</b>   | <b>389</b> | <b>3.8e-7</b>   | <b>0.56</b> | <b>2.52</b> | <b>557</b>  | <b>0.0120</b> | <b>0.23</b> |
| SUA beta freq. (all) | <b>6.30</b>   | <b>232</b> | <b>1.5e-9</b> | <b>0.82</b> | <b>4.99</b>   | <b>391</b> | <b>9.1e-7</b>   | <b>0.54</b> | <b>1.40</b> | <b>1443</b> | <b>0.1617</b> | <b>0.08</b> |
| SUA Beta AUC         | 0.265         | 252        | 0.7913        | 0.03        | -1.92         | 398        | 0.0554          | -0.21       | -1.90       | 1463        | 0.0576        | -0.10       |
| SUA beta peak        | <b>-2.505</b> | <b>252</b> | <b>0.0129</b> | <b>0.32</b> | -1.14         | 398        | 0.2559          | -0.12       | -1.73       | 1463        | 0.0841        | -0.09       |

**Table S8. Comparison of NHP LFP and single unit beta properties in drug-naïve and control-saline conditions.** (a) Descriptive statistics (b) Results of two-samples student's t-test. p – p value. g – effect size estimated by Hedge's g. Results are presented in Fig.S8 and S9. Source data are provided as a Source Data file. SUA: single unit activity, freq: frequency, AUC: area under the curve, dlPFC dorsolateral prefrontal cortex, GPe: globus pallidis pars externa, Sal: saline, Amp: amphetamine, Apo: apomorphine, Hal: haloperidol, osc: oscillatory, SD: standard deviation,

|                | dlPFC-dlPFC |       |       |       |       | GPe-GPe |       |       |       |       | dlPFC-GPe |       |       |       |       |
|----------------|-------------|-------|-------|-------|-------|---------|-------|-------|-------|-------|-----------|-------|-------|-------|-------|
|                | Sal         | Amp   | Apo1  | Apo2  | Hal   | Sal     | Amp   | Apo1  | Apo2  | Hal   | Sal       | Amp   | Apo1  | Apo2  | Hal   |
| LFP coherence  | mean        | 15.39 | 17.3  | 15.89 | 15.16 | 13.74   | 14.96 | 17.53 | 16.48 | 15.23 | 13.19     | 14.28 | 16.69 | 14.77 | 13.49 |
| beta frequency | SD          | 2.07  | 1.73  | 3     | 2.55  | 2.09    | 1.73  | 1.29  | 2.56  | 2     | 0.62      | 2.12  | 1.38  | 2.53  | 1.18  |
| LFP coherence  | mean        | 4.648 | 6.028 | 4.401 | 4.182 | 5.804   | 8.3   | 9.993 | 9.79  | 8.807 | 7.988     | 3.055 | 3.023 | 3.708 | 3.526 |
| beta AUC       | SD          | 3.755 | 4.023 | 3.538 | 3.275 | 4.267   | 4.677 | 4.722 | 5.306 | 4.746 | 3.973     | 1.395 | 1.347 | 1.894 | 1.66  |
| LFP coherence  | mean        | 0.247 | 0.333 | 0.22  | 0.217 | 0.302   | 0.453 | 0.563 | 0.504 | 0.461 | 0.453     | 0.209 | 0.261 | 0.25  | 0.256 |
| beta peak      | SD          | 0.17  | 0.177 | 0.161 | 0.152 | 0.191   | 0.206 | 0.184 | 0.215 | 0.19  | 0.175     | 0.108 | 0.12  | 0.117 | 0.144 |

**b**

|                    | dlPFC-dlPFC   |                 |                |             |               | GPe-GPe       |                |                |             |               | dlPFC-GPe     |                |                |             |  |
|--------------------|---------------|-----------------|----------------|-------------|---------------|---------------|----------------|----------------|-------------|---------------|---------------|----------------|----------------|-------------|--|
|                    | $\chi^2$      | df              | p              | $\eta^2$    | Beta peak     | $\chi^2$      | df             | p              | $\eta^2$    | Beta peak     | $\chi^2$      | df             | p              | $\eta^2$    |  |
| LFP beta frequency | <b>281.07</b> | <b>(4,1157)</b> | <b>1.3e-59</b> | <b>0.18</b> | <b>6.0e-7</b> | <b>399.93</b> | <b>(4,740)</b> | <b>2.9e-85</b> | <b>0.47</b> | <b>4.0e-5</b> | <b>213.52</b> | <b>(4,475)</b> | <b>4.6e-45</b> | <b>0.37</b> |  |
| LFP Beta AUC       | <b>43.64</b>  | <b>(4,1157)</b> | <b>7.6e-9</b>  | <b>0.03</b> | <b>0.405</b>  | <b>26.55</b>  | <b>(4,740)</b> | <b>2.4e-5</b>  | <b>0.05</b> | <b>-0.47</b>  | <b>26.63</b>  | <b>(4,475)</b> | <b>2.4e-5</b>  | <b>0.05</b> |  |
| LFP beta peak      | <b>75.84</b>  | <b>(4,1157)</b> | <b>1.3e-15</b> | <b>0.06</b> | <b>0.18</b>   | <b>41.09</b>  | <b>(4,740)</b> | <b>2.6e-8</b>  | <b>0.05</b> | <b>-0.36</b>  | <b>27.78</b>  | <b>(4,475)</b> | <b>1.4e-5</b>  | <b>0.04</b> |  |

**c**

|      | dlPFC-dlPFC   |              |               |              |               | GPe-GPe      |               |              |               |              | dlPFC-GPe     |              |               |              |               |              |               |              |
|------|---------------|--------------|---------------|--------------|---------------|--------------|---------------|--------------|---------------|--------------|---------------|--------------|---------------|--------------|---------------|--------------|---------------|--------------|
|      | beta freq.    | beta AUC     | Beta peak     | beta freq.   | beta AUC      | Beta peak    | beta freq.    | beta AUC     | Beta peak     | beta freq.   | beta AUC      | Beta peak    |               |              |               |              |               |              |
| Sal  | <b>9.9e-9</b> | <b>-0.98</b> | <b>5.6e-5</b> | <b>-0.36</b> | <b>6.0e-7</b> | <b>-0.50</b> | <b>9.9e-9</b> | <b>-1.64</b> | <b>0.033</b>  | <b>-0.36</b> | <b>4.0e-5</b> | <b>-0.56</b> | <b>9.9e-9</b> | <b>-1.38</b> | <b>1.000</b>  | <b>0.02</b>  | <b>0.004</b>  | <b>-0.45</b> |
| Apo1 | <b>5.8e-5</b> | <b>-0.46</b> | <b>0.975</b>  | <b>0.01</b>  | <b>0.405</b>  | <b>0.14</b>  | <b>9.9e-9</b> | <b>-1.31</b> | <b>0.001</b>  | <b>-0.47</b> | <b>0.001</b>  | <b>-0.43</b> | <b>2.9e-5</b> | <b>-0.74</b> | <b>0.003</b>  | <b>-0.48</b> | <b>0.258</b>  | <b>-0.31</b> |
| Sal  | <b>0.711</b>  | <b>0.10</b>  | <b>0.779</b>  | <b>0.13</b>  | <b>0.324</b>  | <b>0.18</b>  | <b>0.851</b>  | <b>-0.14</b> | <b>0.964</b>  | <b>-0.11</b> | <b>1.000</b>  | <b>-0.04</b> | <b>0.160</b>  | <b>0.44</b>  | <b>0.260</b>  | <b>-0.31</b> | <b>0.040</b>  | <b>-0.44</b> |
| Apo2 | <b>9.9e-9</b> | <b>0.79</b>  | <b>0.004</b>  | <b>-0.29</b> | <b>0.007</b>  | <b>-0.31</b> | <b>9.9e-9</b> | <b>1.30</b>  | <b>0.980</b>  | <b>0.07</b>  | <b>0.999</b>  | <b>-0.00</b> | <b>7.8e-4</b> | <b>0.59</b>  | <b>0.780</b>  | <b>0.15</b>  | <b>0.791</b>  | <b>0.04</b>  |
| Sal  | <b>1.2e-6</b> | <b>0.24</b>  | <b>7.7e-4</b> | <b>0.36</b>  | <b>1.0e-8</b> | <b>0.63</b>  | <b>0.837</b>  | <b>-0.09</b> | <b>0.966</b>  | <b>-0.14</b> | <b>0.871</b>  | <b>0.08</b>  | <b>0.013</b>  | <b>0.28</b>  | <b>0.001</b>  | <b>-0.52</b> | <b>0.807</b>  | <b>0.14</b>  |
| Amp  | <b>9.9e-9</b> | <b>0.95</b>  | <b>3.8e-7</b> | <b>0.51</b>  | <b>9.9e-9</b> | <b>0.71</b>  | <b>9.9e-9</b> | <b>1.34</b>  | <b>0.197</b>  | <b>0.25</b>  | <b>1.7e-4</b> | <b>0.55</b>  | <b>9.9e-9</b> | <b>2.44</b>  | <b>0.184</b>  | <b>-0.34</b> | <b>0.998</b>  | <b>0.04</b>  |
| Apo2 | <b>9.9e-9</b> | <b>1.84</b>  | <b>0.835</b>  | <b>0.05</b>  | <b>0.282</b>  | <b>0.17</b>  | <b>9.9e-9</b> | <b>4.40</b>  | <b>0.010</b>  | <b>0.46</b>  | <b>3.5e-5</b> | <b>0.62</b>  | <b>9.9e-9</b> | <b>2.32</b>  | <b>0.773</b>  | <b>0.13</b>  | <b>1.2e-4</b> | <b>0.44</b>  |
| Hal  | <b>9.9e-9</b> | <b>1.84</b>  | <b>0.835</b>  | <b>0.05</b>  | <b>0.282</b>  | <b>0.17</b>  | <b>9.9e-9</b> | <b>4.40</b>  | <b>0.010</b>  | <b>0.46</b>  | <b>3.5e-5</b> | <b>0.62</b>  | <b>9.9e-9</b> | <b>2.32</b>  | <b>0.773</b>  | <b>0.13</b>  | <b>1.2e-4</b> | <b>0.44</b>  |
| Apo1 | <b>1.3e-7</b> | <b>0.51</b>  | <b>0.420</b>  | <b>0.12</b>  | <b>1.000</b>  | <b>0.04</b>  | <b>9.9e-9</b> | <b>1.10</b>  | <b>0.024</b>  | <b>0.37</b>  | <b>0.004</b>  | <b>0.40</b>  | <b>1.0e-8</b> | <b>1.20</b>  | <b>0.541</b>  | <b>0.20</b>  | <b>0.952</b>  | <b>-0.10</b> |
| Apo2 | <b>9.9e-9</b> | <b>1.03</b>  | <b>0.031</b>  | <b>-0.30</b> | <b>9.3e-6</b> | <b>-0.44</b> | <b>9.9e-9</b> | <b>2.48</b>  | <b>3.5e-4</b> | <b>0.56</b>  | <b>8.8e-4</b> | <b>0.45</b>  | <b>9.9e-9</b> | <b>1.25</b>  | <b>9.4e-5</b> | <b>0.58</b>  | <b>0.027</b>  | <b>0.30</b>  |
| Hal  | <b>1.1e-8</b> | <b>0.60</b>  | <b>7.0e-5</b> | <b>-0.43</b> | <b>4.7e-6</b> | <b>-0.50</b> | <b>9.9e-9</b> | <b>1.36</b>  | <b>0.768</b>  | <b>0.19</b>  | <b>0.995</b>  | <b>0.04</b>  | <b>0.454</b>  | <b>0.26</b>  | <b>0.025</b>  | <b>0.44</b>  | <b>0.002</b>  | <b>0.41</b>  |

**Table S9. Properties of LFP beta coherence.** (a) Descriptive statistics (b) Results of Kruskal-Wallis test (c) Post-hoc comparison results. p - p value, result of Tukey post-hoc test. g – effect size estimated by Hedge’s g. Results are presented in Fig. 4. Source data are provided as a Source Data file. LFP: local field potential, AUC: area under the curve, dlPFC dorsolateral prefrontal cortex, GPe globus pallidus pars externa, Sal: saline, Amp: amphetamine, Apo: apomorphine, Hal: haloperidol,

**a**

|                | dlPFC-dlPFC |        |        |        |        | GPe-GPe |        |        |        |        | dlPFC-GPe |        |        |       |        |        |
|----------------|-------------|--------|--------|--------|--------|---------|--------|--------|--------|--------|-----------|--------|--------|-------|--------|--------|
|                | Sal         | Amp    | Apo1   | Apo2   | Hal    | Sal     | Amp    | Apo1   | Apo2   | Hal    | Sal       | Amp    | Apo1   | Apo2  | Hal    |        |
| LFP coherence  | mean        | 15.781 | 17.846 | 15.881 | 15.212 | 14.033  | 15.519 | 17.975 | 16.559 | 15.537 | 13.852    | 14.971 | 17.044 | 15.22 | 14.226 | 13.382 |
| beta frequency | SD          | 1.602  | 1.408  | 2.354  | 1.8    | 1.892   | 1.444  | 0.908  | 1.985  | 1.346  | 0.725     | 1.812  | 1.48   | 2.072 | 1.283  | 1.211  |
| LFP coherence  | mean        | 6.115  | 8.06   | 5.808  | 5.397  | 7.426   | 9.73   | 11.996 | 11.445 | 10.253 | 9.526     | 4.487  | 4.959  | 5.446 | 5.015  | 4.1    |
| beta AUC       | SD          | 4.084  | 4.278  | 4.143  | 3.737  | 4.551   | 4.735  | 4.512  | 4.924  | 4.354  | 3.931     | 1.98   | 2.093  | 2.364 | 2.014  | 2.051  |
| LFP coherence  | mean        | 0.29   | 0.374  | 0.264  | 0.254  | 0.343   | 0.461  | 0.57   | 0.514  | 0.47   | 0.46      | 0.25   | 0.306  | 0.296 | 0.289  | 0.242  |
| beta peak      | SD          | 0.159  | 0.161  | 0.161  | 0.147  | 0.173   | 0.193  | 0.165  | 0.18   | 0.159  | 0.16      | 0.106  | 0.118  | 0.109 | 0.097  | 0.136  |

**b**

|                     | dlPFC-dlPFC |    |         |          |          | GPe-GPe |         |          |        |    | dlPFC-GPe |       |          |    |   |          |
|---------------------|-------------|----|---------|----------|----------|---------|---------|----------|--------|----|-----------|-------|----------|----|---|----------|
|                     | $\chi^2$    | df | p       | $\eta^2$ | $\chi^2$ | df      | p       | $\eta^2$ | t      | df | p         | $\xi$ | $\chi^2$ | df | p | $\eta^2$ |
| LFP beta frequency/ | 329.26      | 4  | 5.3e-70 | 0.268    | 414.20   | 4       | 2.4e-88 | 0.527    | 223.60 | 4  | 3.1e-47   | 0.407 |          |    |   |          |
| LFP Beta AUC        | 60.30       | 4  | 2.5e-12 | 0.045    | 44.16    | 4       | 5.9e-9  | 0.069    | 32.86  | 4  | 1.3e-6    | 0.063 |          |    |   |          |
| LFP beta peak       | 76.48       | 4  | 9.7e-16 | 0.063    | 52.31    | 4       | 1.2e-10 | 0.071    | 30.66  | 4  | 3.6e-6    | 0.051 |          |    |   |          |

**c**

|      | dlPFC-dlPFC |          |           |            |          | GPe-GPe   |            |          |           |            | dlPFC-GPe |           |            |          |           |        |        |        |       |
|------|-------------|----------|-----------|------------|----------|-----------|------------|----------|-----------|------------|-----------|-----------|------------|----------|-----------|--------|--------|--------|-------|
|      | beta freq.  | beta AUC | Beta peak | beta freq. | beta AUC | Beta peak | beta freq. | beta AUC | Beta peak | beta freq. | beta AUC  | Beta peak | beta freq. | beta AUC | Beta peak |        |        |        |       |
| Sal  | 9.9e-9      | -1.35    | 5.1e-6    | -0.47      | 2.1e-6   | -0.52     | 9.9e-9     | -1.95    | 7.8e-4    | -0.48      | 5.3e-6    | -0.60     | 9.9e-9     | -1.27    | 0.339     | -0.23  | 7.6e-4 | -0.49  |       |
| Sal  | 0.007       | -0.36    | 1.000     | -0.03      | 0.512    | 0.10      | 9.9e-9     | -1.17    | 1.9e-5    | -0.58      | 2.4e-4    | -0.51     | 2.9e-4     | -0.64    | 1.7e-4    | -0.62  | 0.014  | -0.47  |       |
| Sal  | Apo2        | 0.019    | 0.33      | 0.214      | 0.18     | 0.082     | 0.24       | 0.996    | -0.01     | 0.969      | -0.11     | 1.000     | -0.05      | 0.112    | 0.46      | 0.525  | -0.26  | 0.131  | -0.38 |
| Sal  | Hal         | 9.9e-9   | 1.01      | 0.010      | -0.31    | 0.012     | -0.32      | 9.9e-9   | 1.43      | 0.971      | 0.05      | 0.982     | 0.00       | 1.8e-6   | 1.00      | 0.609  | 0.19   | 0.942  | 0.07  |
| Amp  | Apo1        | 1.0e-8   | 0.58      | 5.5e-6     | 0.42     | 1.1e-8    | 0.59       | 0.152    | 0.26      | 0.987      | -0.12     | 0.844     | 0.07       | 0.011    | 0.43      | 0.039  | -0.41  | 0.998  | 0.02  |
| Amp  | Apo2        | 9.9e-9   | 1.59      | 1.0e-8     | 0.67     | 9.9e-9    | 0.78       | 9.9e-9   | 2.08      | 0.012      | 0.39      | 8.0e-6    | 0.61       | 9.9e-9   | 1.99      | 1.000  | 0.03   | 0.737  | 0.15  |
| Amp  | Hal         | 9.9e-9   | 2.27      | 0.441      | 0.14     | 0.316     | 0.18       | 9.9e-9   | 5.08      | 1.6e-4     | 0.59      | 1.4e-6    | 0.67       | 9.9e-9   | 2.63      | 0.012  | 0.41   | 1.1e-4 | 0.51  |
| Apo1 | Apo2        | 1.4e-8   | 0.59      | 0.257      | 0.20     | 0.881     | 0.12       | 9.9e-9   | 1.17      | 8.4e-4     | 0.49      | 3.1e-4    | 0.50       | 1.4e-8   | 1.12      | 0.066  | 0.38   | 0.929  | 0.13  |
| Apo1 | Hal         | 9.9e-9   | 1.07      | 0.009      | -0.27    | 4.3e-5    | -0.40      | 9.9e-9   | 2.43      | 3.5e-6     | 0.67      | 6.5e-5    | 0.56       | 9.9e-9   | 1/59      | 9.4e-7 | 0.76   | 0.002  | 0.47  |
| Apo2 | Hal         | 7.8e-8   | 0.64      | 2.7e-6     | -0.49    | 4.5e-7    | 0.56       | 9.9e-9   | 1.57      | 0.752      | 0.17      | 0.995     | 0.06       | 0.047    | 0.67      | 0.040  | 0.45   | 0.030  | 0.40  |

**Table S10. Properties of LFP beta PLV.** (a) Descriptive statistics (b) Results of Kruskal-Wallis test (c) Post-hoc comparison results. p - p value, result of Tukey post-hoc test. g - effect size estimated by Hedge's g. Results are presented in Fig. S11. Source data are provided as a Source Data file.

freq: frequency, dlPFC dorsolateral prefrontal cortex, GPe: globus pallidis pars externa, Sal: saline, Amp: amphetamine, Apo: apomorphine, Hal: haloperidol, HF: high frequency, AUC: area under the curve



**a**

|                  |                     | Wide                   |       |           |       |       | narrow                 |       |           |       |       | HFD                    |       |           |       |       |
|------------------|---------------------|------------------------|-------|-----------|-------|-------|------------------------|-------|-----------|-------|-------|------------------------|-------|-----------|-------|-------|
|                  |                     | Descriptive statistics |       |           |       |       | Descriptive statistics |       |           |       |       | Descriptive statistics |       |           |       |       |
|                  |                     | Sal                    | Amp   | Apo1      | Apo2  | Hal   | Sal                    | Amp   | Apo1      | Apo2  | Hal   | Sal                    | Amp   | Apo1      | Apo2  | Hal   |
| Ent. Probability |                     | 0.45                   | 0.57  | 0.37      | 0.31  | 0.38  | 0.66                   | 0.73  | 0.59      | 0.53  | 0.78  | 0.42                   | 0.52  | 0.19      | 0.37  | 0.53  |
| Vector length    | mean                | 0.1                    | 0.095 | 0.095     | 0.085 | 0.087 | 0.101                  | 0.122 | 0.079     | 0.083 | 0.111 | 0.018                  | 0.021 | 0.008     | 0.015 | 0.023 |
|                  | SD                  | 0.07                   | 0.065 | 0.063     | 0.057 | 0.062 | 0.075                  | 0.086 | 0.044     | 0.048 | 0.073 | 0.016                  | 0.024 | 0.007     | 0.017 | 0.022 |
| Group by drugs   | mean                | -2.83                  | -2.82 | -2.96     | -2.83 | -2.82 | -2.11                  | -2.1  | -2.47     | -2.04 | -2.2  | 2.24                   | 3.13  | 1.43      | 1.09  | -0.42 |
|                  | ang. SD             | 0.65                   | 0.63  | 0.6       | 0.86  | 0.87  | 1.06                   | 0.74  | 0.64      | 0.85  | 1.27  | 1.37                   | 1.17  | 1.03      | 1.34  | 1.35  |
| Preferred phase  |                     | Low beta               |       | High beta |       |       | Low beta               |       | High beta |       |       | Low beta               |       | High beta |       |       |
|                  | Group by beta (Sal) | mean                   | -2.82 |           | -2.82 |       | -1.66                  |       | -2.19     |       | 0.58  |                        | 2.68  |           |       |       |
|                  | ang. SD             | 0.62                   | 0.68  |           | 0.68  |       | 1.11                   |       | 1.04      |       | 1.31  |                        | 1.31  |           |       |       |
|                  | Mean                | -2.81                  | -2.83 |           | -2.83 |       | -1.94                  |       | -2.2      |       | 0.77  |                        | 2.92  |           |       |       |
|                  | ang. SD             | 0.75                   | 0.71  |           | 0.71  |       | 1.16                   |       | 0.87      |       | 1.3   |                        | 1.3   |           |       |       |
|                  | Mean                | -2.73                  | -2.91 |           | -2.91 |       | -1.65                  |       | -2.37     |       | 0.42  |                        | 2.90  |           |       |       |
|                  | ang. SD             | 0.84                   | 0.59  |           | 0.59  |       | 1.15                   |       | 0.67      |       | 1.37  |                        | 1.27  |           |       |       |

**b**

|                         |                            | Cortical/wide units |                |                 | Cortical/narrow units |             |                 | Pallidal units |             |                 |         |             |
|-------------------------|----------------------------|---------------------|----------------|-----------------|-----------------------|-------------|-----------------|----------------|-------------|-----------------|---------|-------------|
|                         |                            | test                | Test statistic | Statistic value | P value               | Effect size | Statistic value | P value        | Effect size | Statistic value | P value | Effect size |
| Entrainment probability |                            | $\chi^2$            | $\chi^2$       | 51.87           | 1.5e-10               | 0.18        | 10.95           | 0.027          | 0.19        | 51.52           | 1.7e-10 | 0.19        |
| Vector length           | Grouped by drugs           | KW                  | $\chi^2$       | 11.02           | 0.026                 | 0.009       | 8.12            | 0.087          | 0.04        | 99.83           | 1.1e-20 | 0.04        |
|                         | Grouped by unit beta (Sal) | CM                  | P              | 9.32            | 0.0535                |             | 5.51            | 0.239          |             | 33.45           | 9.7e-07 |             |
| Preferred phase         | Grouped by beta (Sal)      | C,M                 | P              | 0.13            | 0.719                 |             | 0.57            | 0.449          |             | 3.88            | 0.049   |             |
|                         | Grouped by LFP beta (all)  | CM                  | P              | 0.10            | 0.752                 |             | 0.20            | 0.657          |             | 11.91           | 6.0e-4  |             |
|                         | Grouped by LFP beta (all)  | CM                  | P              | 8.48            | 0.004                 |             | 13.87           | 0.0002         |             | 12.51           | 0.0004  |             |

**c**

|      |      | wide                    |               |                 | narrow                  |               |                 | HFD                     |               |                 |       |       |
|------|------|-------------------------|---------------|-----------------|-------------------------|---------------|-----------------|-------------------------|---------------|-----------------|-------|-------|
|      |      | Entrainment probability | Vector length | Preferred phase | Entrainment probability | Vector length | Preferred phase | Entrainment probability | Vector length | Preferred phase |       |       |
| Sal  | Amp  | 0.0049                  | -0.12         | 0.955           | 0.07                    | 1.0000        | -0.08           | 0.0749                  | -0.10         | 1.0000          | -0.15 | 0.274 |
| Sal  | Apo1 | 1.0000                  | -0.06         | 0.996           | 0.08                    | 1.0000        | -0.06           | 1.9e-4                  | -0.20         | 9.9e-9          | 0.68  | 0.273 |
| Sal  | Apo2 | 0.0017                  | -0.14         | 0.087           | 0.23                    | 1.0000        | -0.13           | 1.0000                  | -0.05         | 0.0047          | 0.16  | 0.359 |
| Sal  | Hal  | 0.4696                  | 0.07          | 0.054           | 0.20                    | 1.0000        | -0.13           | 0.0452                  | 0.11          | 0.0305          | -0.25 | 0.486 |
| Amp  | Apo1 | 0.0018                  | -0.17         | 1.000           | 0.01                    | 1.0000        | -0.13           | 2.5e-8                  | -0.29         | 9.9e-9          | 0.60  | 0.110 |
| Amp  | Apo2 | 3.7e-10                 | -0.27         | 0.401           | 0.17                    | 0.1523        | -0.21           | 0.0017                  | -0.15         | 0.0049          | 0.27  | 0.123 |
| Amp  | Hal  | 2.0e-6                  | -0.19         | 0.343           | 0.13                    | 1.0000        | 0.06            | 1.0000                  | 0.01          | 0.0442          | -0.07 | 0.274 |
| Apo1 | Apo2 | 2.0971                  | 0.06          | 0.640           | 0.17                    | 1.0000        | 0.05            | 0.0071                  | -0.17         | 2.0e-5          | -0.48 | 0.273 |
| Apo1 | Hal  | 1.0000                  | -0.01         | 0.623           | 0.12                    | 0.8143        | -0.19           | 1.5e-8                  | 0.31          | 9.9e-9          | -0.76 | 0.597 |
| Apo2 | Hal  | 0.5619                  | -0.07         | 1.000           | -0.04                   | 0.0320        | -0.26           | 0.0010                  | 0.16          | 2.5e-8          | -0.37 | 0.538 |

**Table S11. Properties of SUA-LFP beta entrainment.** (a) Descriptive statistics (b) Results of statistical tests.  $\chi^2$ : Chi-square test. KW: Kruskal-Wallis test. CM: circular median test. For each test the appropriate effect size estimator was selected.  $\eta^2$ : Cramer's v. KW:  $\eta^2$ . For CM test there is no defined effect size estimator for the best of our knowledge (c) Post-hoc comparison results. p - p value, result of Tukey post-hoc test. g – effect size estimated by Hedge's g.  $\Phi$  - effect size estimated by phi coefficient. Comparisons that did not reach statistical significance and didn't require post-hoc test are marked with --. Results are presented in Fig. 5. Source data are provided as a Source Data file. SD: standard deviation, Sal: saline, Amp: amphetamine, Apo: apomorphine, Hal: haloperidol, HF: high frequency,

**a**

|                |      | dIPFC HF amplitude to GPe beta phase |       |       |       |       | GPe HF amplitude to dIPFC beta phase |       |       |       |       |
|----------------|------|--------------------------------------|-------|-------|-------|-------|--------------------------------------|-------|-------|-------|-------|
|                |      | Sal                                  | Amp   | Apo1  | Apo2  | Hal   | Sal                                  | Amp   | Apo1  | Apo2  | Hal   |
| Max PAC beta f | mean | 15.41                                | 17.35 | 17.64 | 15.27 | 12.93 | 15.525                               | 14.80 | 16.08 | 15.23 | 15.03 |
|                | SD   | 3.62                                 | 4.72  | 4.21  | 4.15  | 3.26  | 5.03                                 | 4.96  | 5.41  | 5.20  | 4.62  |
| Max PAC        | mean | 6.701                                | 5.649 | 4.960 | 4.957 | 8.009 | 3.055                                | 3.926 | 2.895 | 2.978 | 3.420 |
|                | SD   | 3.803                                | 3.202 | 2.874 | 2.727 | 5.138 | 1.160                                | 1.785 | 0.818 | 1.019 | 1.724 |

**b**

|                     |                   | F            | df1      | df2        | p              | $\eta^2$     |
|---------------------|-------------------|--------------|----------|------------|----------------|--------------|
| dIPFC HF – GPe beta | Max PAC frequency | <b>17.71</b> | <b>4</b> | <b>454</b> | <b>1.6e-13</b> | <b>0.135</b> |
|                     | Max PAC           | <b>10.12</b> | <b>4</b> | <b>454</b> | <b>7.5e-8</b>  | <b>0.082</b> |
| GPe HF – dIPFC beta | Max PAC frequency | <b>0.88</b>  | <b>4</b> | <b>452</b> | <b>0.48</b>    | <b>0.008</b> |
|                     | Max PAC           | <b>10.07</b> | <b>4</b> | <b>452</b> | <b>8.2e-8</b>  | <b>0.082</b> |

**c**

|      |      | dIPFC HF amplitude to GPe beta phase |              |               |              | GPe HF amplitude to dIPFC beta phase |               |               |              |
|------|------|--------------------------------------|--------------|---------------|--------------|--------------------------------------|---------------|---------------|--------------|
|      |      | Beta frequency of maximum PAC        |              | Maximum PAC   |              | Beta frequency of maximum PAC        |               | Maximum PAC   |              |
|      |      | p                                    | g            | p             | g            | p                                    | g             | p             | g            |
| Sal  | Amp  | <b>0.0032</b>                        | <b>-0.45</b> | 0.1727        | 0.30         | ---                                  |               | <b>2.6e-5</b> | <b>-0.56</b> |
| Sal  | Apo1 | <b>0.0028</b>                        | <b>-0.57</b> | <b>0.0112</b> | <b>0.51</b>  |                                      | 0.9439        | 0.16          |              |
| Sal  | Apo2 | 0.9995                               | 0.03         | <b>0.0115</b> | <b>0.51</b>  |                                      | 0.9963        | 0.07          |              |
| Sal  | Hal  | <b>9.3e-4</b>                        | <b>0.71</b>  | 0.1276        | -0.30        |                                      | 0.4496        | -0.26         |              |
| Amp  | Apo1 | 0.9875                               | -0.06        | 0.6629        | 0.22         |                                      | <b>3.2e-6</b> | <b>0.68</b>   |              |
| Amp  | Apo2 | <b>0.0039</b>                        | <b>0.46</b>  | 0.6630        | 0.23         |                                      | <b>2.2e-5</b> | <b>0.61</b>   |              |
| Amp  | Hal  | <b>9.9e-9</b>                        | <b>1.03</b>  | <b>7.6e-5</b> | <b>-0.59</b> |                                      | 0.1045        | 0.29          |              |
| Apo1 | Apo2 | <b>0.0030</b>                        | <b>0.56</b>  | 1.0000        | 0.00         |                                      | 0.9960        | -0.09         |              |
| Apo1 | Hal  | <b>9.9e-9</b>                        | <b>1.24</b>  | <b>2.2e-6</b> | <b>-0.74</b> |                                      | 0.1574        | -0.39         |              |
| Apo2 | Hal  | <b>0.0048</b>                        | <b>0.62</b>  | <b>2.3e-6</b> | <b>-0.75</b> |                                      | 0.3097        | -0.31         |              |

**Supplementary Table 12. Properties of LFP HF beta PAC.** (a) Descriptive statistics. (b) Results of one-way anova tests with PAC properties as dependent factors and drug condition as independent factor. Test was conducted for each PAC property (i.e. each row) separately. (c) Post-hoc Tukey test results. p-p value, results of Tukey post-hoc test. g- effect size estimated by Hedge's g. Comparisons that did not reach statistical significance and didn't require post-hoc test are marked with ---. Results are presented in Figure 6. Source data are provided as a Source Data file. PAC: phase amplitude coupling, f: frequency, SD: standard deviation, dIPFC dorsolateral prefrontal cortex, GPe globus pallidis pars externa, Sal: saline, Amp: amphetamine, Apo: apomorphine, Hal: haloperidol, HF: high frequency.

|                | Dependent variable  | Factor     | F             | DF 1     | DF 2       | p              |
|----------------|---------------------|------------|---------------|----------|------------|----------------|
| Beta nPSD      | High-beta frequency | Time       | <b>33.949</b> | <b>1</b> | <b>462</b> | <b>1.1e-08</b> |
|                |                     | DRT        | 2.1604        | 1        | 462        | 0.1423         |
|                |                     | Time x DRT | <b>25.36</b>  | <b>1</b> | <b>462</b> | <b>6.8e-07</b> |
|                | Low-beta frequency  | Time       | 0.101         | 1        | 414        | 0.7508         |
|                |                     | DRT        | 3.736         | 1        | 414        | 0.0539         |
|                |                     | Time x DRT | 1.1366        | 1        | 414        | 0.287          |
|                | High-beta AUC       | Time       | 0.7346        | 1        | 736        | 0.3917         |
|                |                     | DRT        | 3.3476        | 1        | 736        | 0.0677         |
|                |                     | Time x DRT | 3.558         | 1        | 736        | 0.0597         |
|                | Low-beta AUC        | Time       | 1.4921        | 1        | 665        | 0.2223         |
|                |                     | DRT        | <b>40.934</b> | <b>1</b> | <b>665</b> | <b>2.9e-10</b> |
|                |                     | Time x DRT | <b>6.3891</b> | <b>1</b> | <b>665</b> | <b>0.0117</b>  |
| Beta coherence | High-beta frequency | Time       | <b>8.0614</b> | <b>1</b> | <b>120</b> | <b>0.0053</b>  |
|                |                     | DRT        | 3.266         | 1        | 120        | 0.0732         |
|                |                     | Time x DRT | 0.4526        | 1        | 120        | 0.5024         |
|                | Low-beta frequency  | Time       | 0.5466        | 1        | 201        | 0.4606         |
|                |                     | DRT        | 0.6182        | 1        | 201        | 0.4327         |
|                |                     | Time x DRT | 2.0826        | 1        | 201        | 0.1505         |
|                | High-beta AUC       | Time       | 1.9532        | 1        | 200        | 0.1638         |
|                |                     | DRT        | 2.5503        | 1        | 200        | 0.11185        |
|                |                     | Time x DRT | <b>5.6426</b> | <b>1</b> | <b>200</b> | <b>0.0185</b>  |
|                | Low-beta AUC        | Time       | 0.0221        | 1        | 476        | 0.88185        |
|                |                     | DRT        | 0.2927        | 1        | 476        | 0.5887         |
|                |                     | Time x DRT | 3.7752        | 1        | 476        | 0.0526         |

**Supplementary Table 13: Time and DRT effects on beta properties in PD patients.** To estimate the effect of time and DRT on beta properties in patients with PD, a mixed linear effect model (MLEM) was constructed for each dependent variable (columns 1 and 2). The model included fixed effect terms for time, DRT and their interaction (column 3). The resulted estimated coefficients are presented in column 4. One-way ANOVA was used on the model output to determine the significance of each factor. ANOVA results are presented in columns 4-7. Note that a separate model was constructed for high-beta and low-beta properties. Subjects were clustered as having low-beta, high-beta or both and traces were included in the analysis accordingly. i.e. If a subject had low-beta, all his traces were included in the low-beta analysis and the same for high-beta. Only traces with significant beta peaks were included in the frequency models. Time x DRT estimated-coefficient represents time effect given on DRT condition, in addition to the main time effect. A significant positive estimated-coefficient indicated that time slope in the on DRT condition was significantly more positive (or less negative) than time slope in the off DRT condition, and vice versa for negative values. Source data are provided as a Source Data file. nPSD: normalized power spectral density, DF: degrees of freedom, AUC: area under the curve, DRT: dopamine replacement therapy

| Pts.   | Age   | Gender | Duration of disease (years) | Baseline Medications (dose)                                                             | Levodopa Equivalent Dose (LED) | Baseline UPDRS III motor score (PD) | DBS Lead Target [x,y,z]                                        | Optimal stimulation parameters: (Frequency (Hz); Pulse Duration (µs); Contact configuration; Voltage(V)) |
|--------|-------|--------|-----------------------------|-----------------------------------------------------------------------------------------|--------------------------------|-------------------------------------|----------------------------------------------------------------|----------------------------------------------------------------------------------------------------------|
| Jur 01 | 60-70 | F      | 8-10                        | Stalevo 50 mg q4d<br>Rasagiline 2 mg qid                                                | 1066                           | 35                                  | Left:<br>[-12, -4, -4.5]<br><br>Right:<br>[12.25, -3.5, -5.5]  | Left:<br>(180; 60; c+9-; 2)<br><br>Right:<br>(180; 60; c+1-; 1.9)                                        |
| Jur 03 | 50-60 | M      | 8-10                        | Carbidopa 12.5 mg q3h<br>Levodopa 125 mg q3h<br>Biperiden 1mg q4h<br>Ropinirole 4mg qid | 1257.5                         | 31                                  | Left:<br>[-11.25, -1.75, -4.5]<br><br>Right:<br>[11, -2.5, -5] | Left:<br>(130; 60; c+9-; 2.1)<br><br>Right:<br>(130; 60; c+1-; 1.6)                                      |
| Jur 05 | 50-60 | F      | 8-10                        | Carbidopa 25 mg q6h<br>Levodopa 250 mg q6h                                              | 1125                           | 42                                  | Left:<br>[-10.5, -2.5, -4]<br><br>Right:<br>[10.75, -3.5, -5]  | Left:<br>(130; 60; c+8-11; 1.9)<br><br>Right:<br>(130; 60; c+1-2-; 1.3)                                  |
| Jur 06 | 50-60 | F      | 8-10                        | Carbidopa 25 mg q5h<br>Levodopa 250 mg q5h<br>Rasagiline 1mg qid<br>Ropinirole 8mg qid  | 2165                           | 43                                  | Left:<br>[-11, -3, -4]<br><br>Right:<br>[11.5, -3, -4.5]       | Left:<br>(130; 60; c+9-11-; 2.2)<br><br>Right:<br>(130; 60; c+1-3-; 1.8)                                 |

**Supplementary Table 14: Patient demographics and treatment.**
