# Supplementary material for: Modulation of dopamine tone induces frequency shifts in cortico-basal ganglia beta oscillations
Source: PubMed Central journal article supplement (PMC8640051; doi:10.1038/s41467-021-27375-5), 2021-12-02
Supplement: 41467_2021_27375_MOESM2_ESM.pdf [file 41467_2021_27375_MOESM2_ESM.pdf]

## **Description of Additional Supplementary Files**

File Name: Supplementary Movie 1

Description: Eye movement during control recordings.

File Name: Supplementary Movie 2

Description: Eye movement during amphetamine recordings.

File Name: Supplementary Movie 3

Description: Eye movement during apomorphine recordings.

File Name: Supplementary Movie 4

Description: Eye movement during haloperidol recordings.
